# Supplementary material
Source: publisher figshare collection journal article supplement (https://gsajournals.figshare.com/articles/dataset/_/13345268)
Supplement: Supplementary file 1 [file 1]

A01

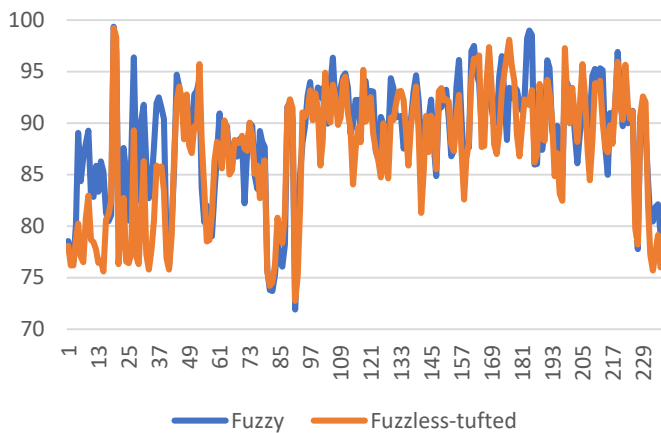

A02

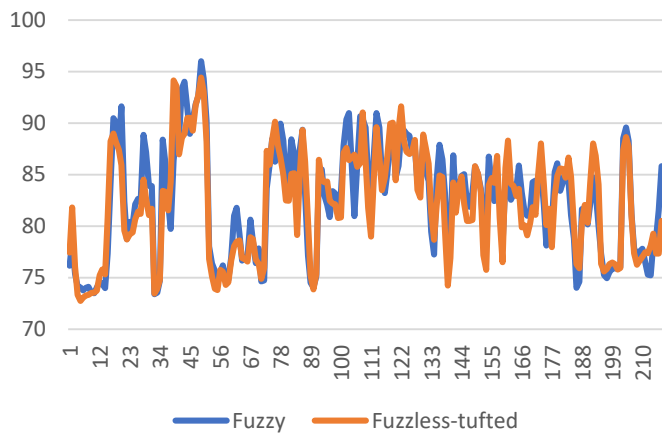

A03

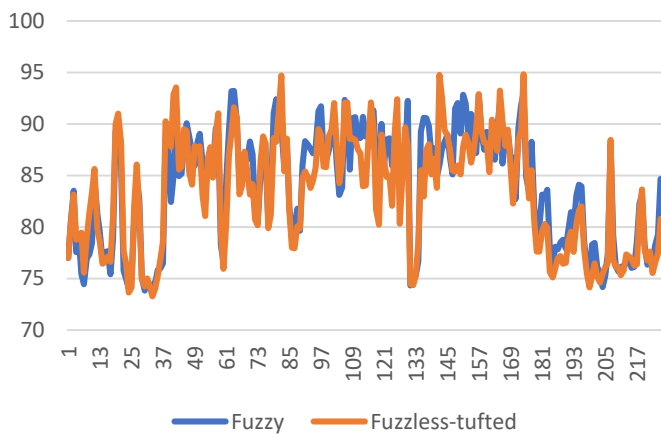

A04

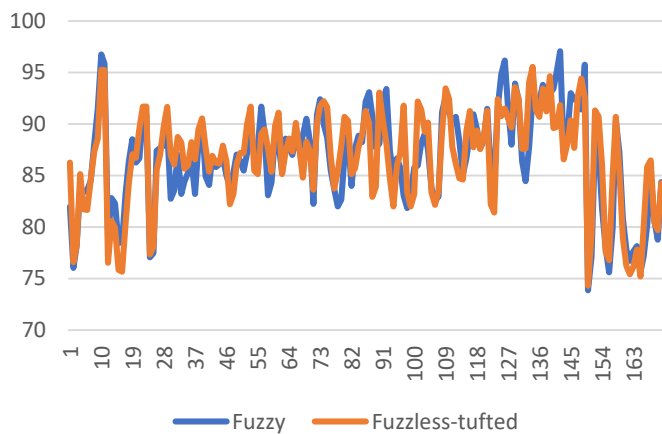

A05

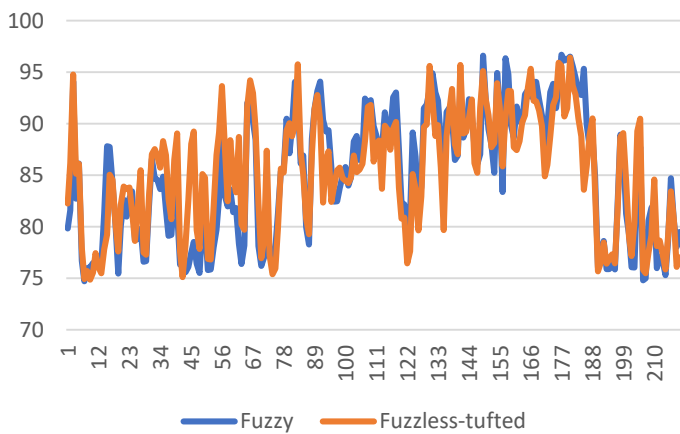

A06

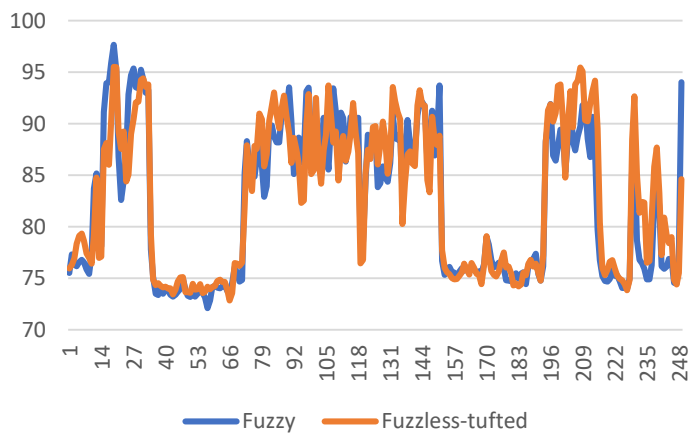

A07

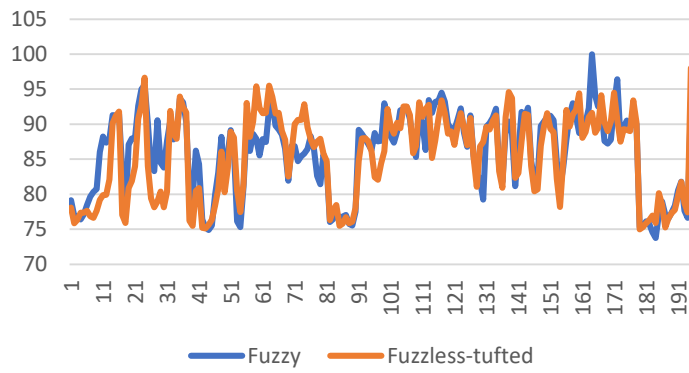

A08

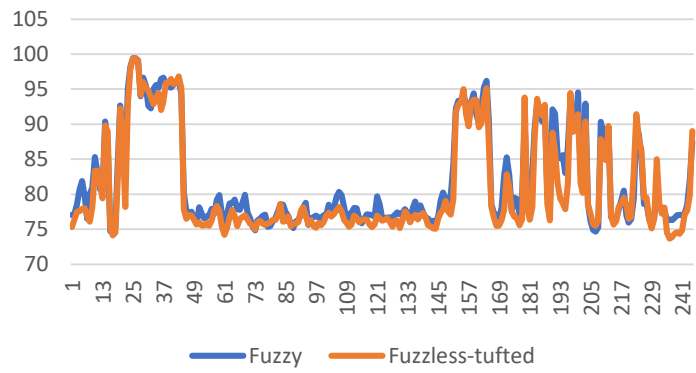

A09

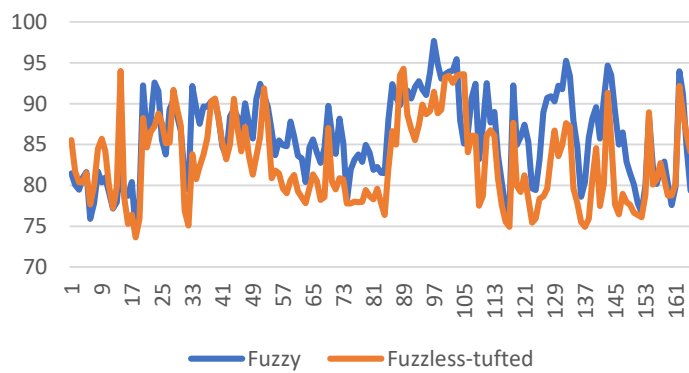

A10

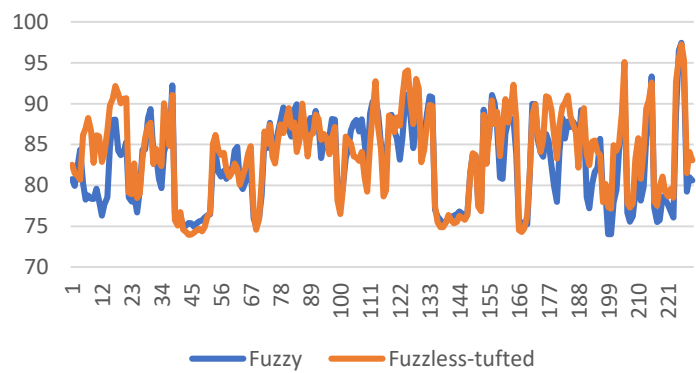

A11

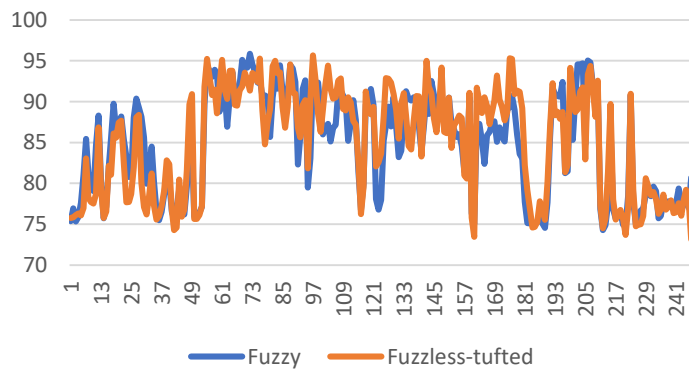

A12

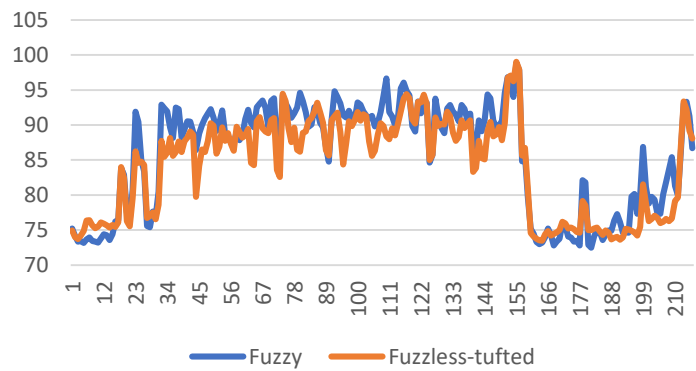

A13

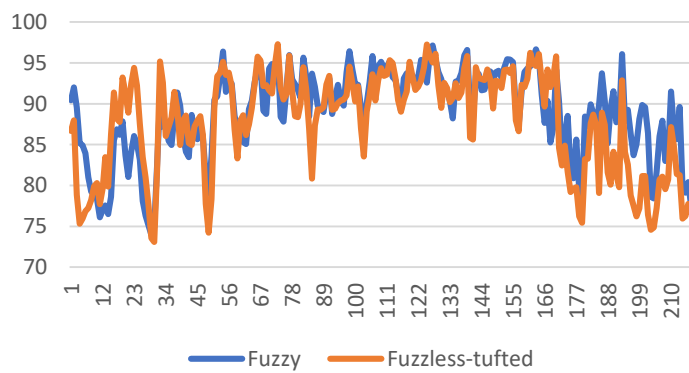

D01

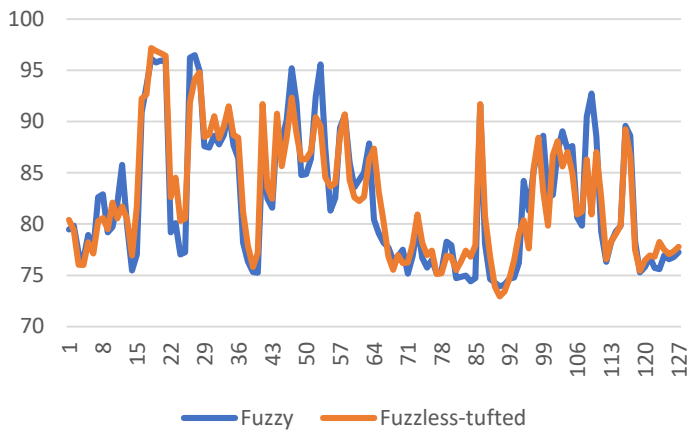

D02

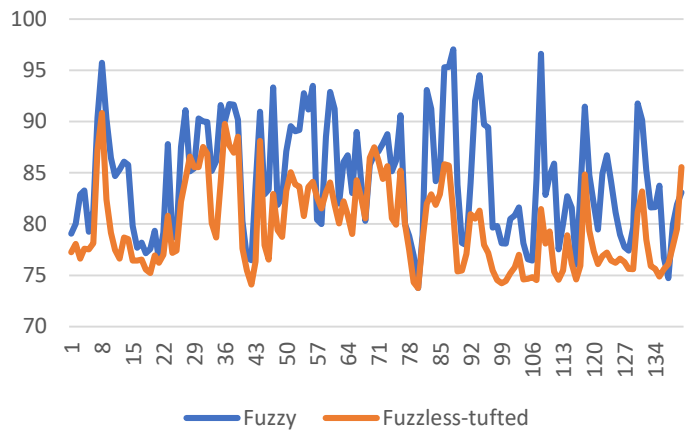

D03

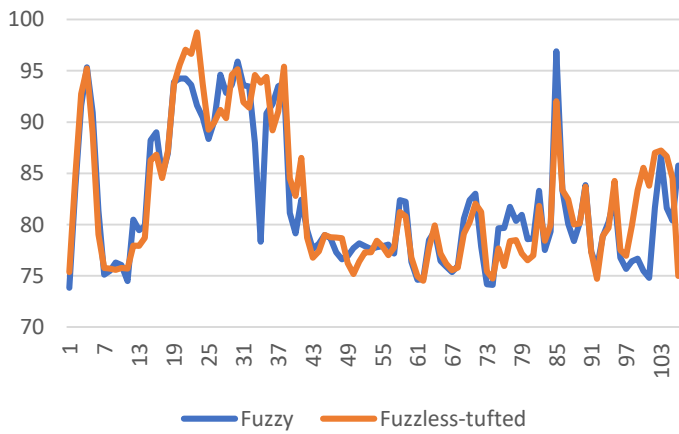

D04

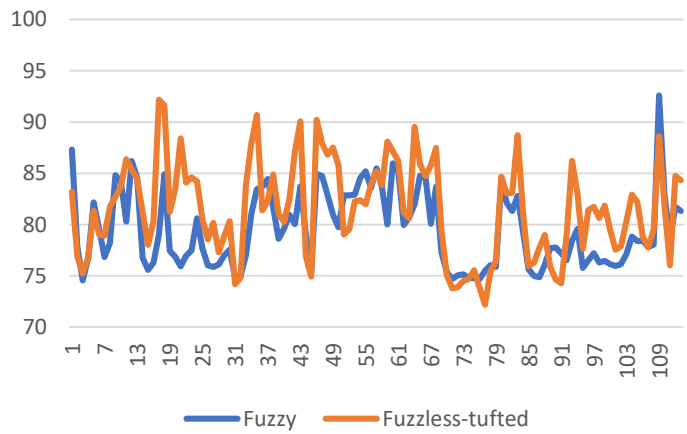

D05

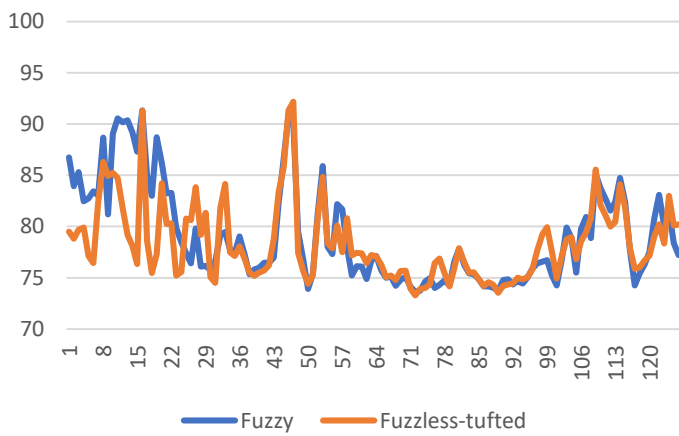

D06

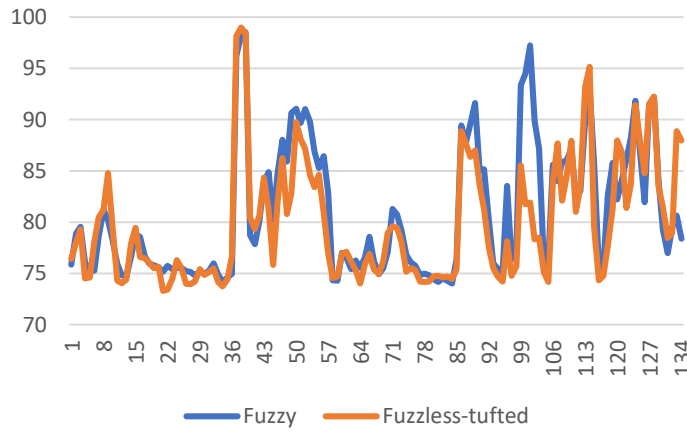

D07

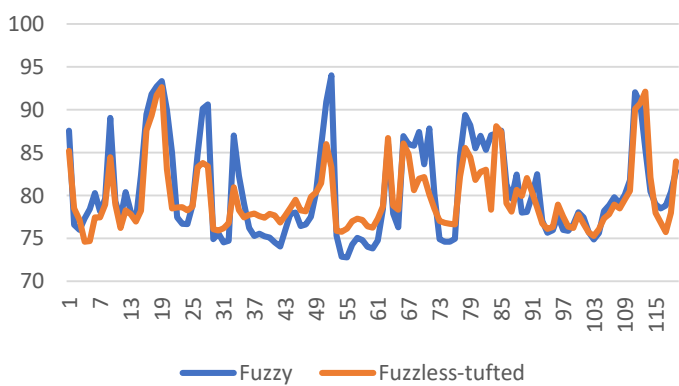

D08

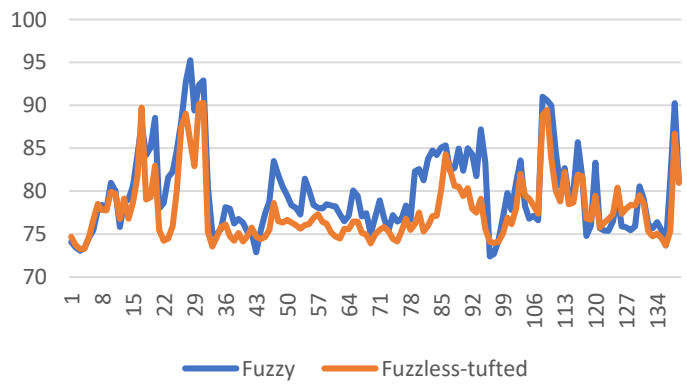

D09

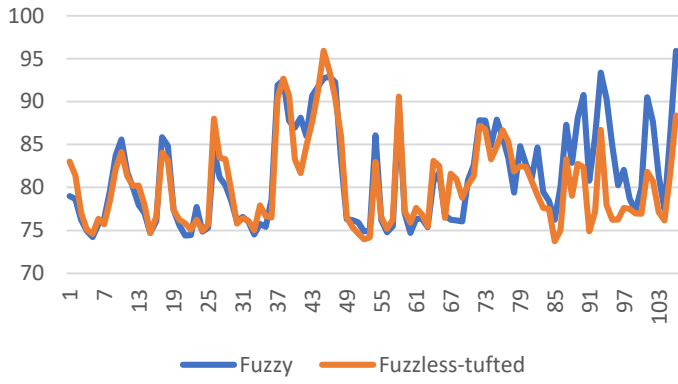

D10

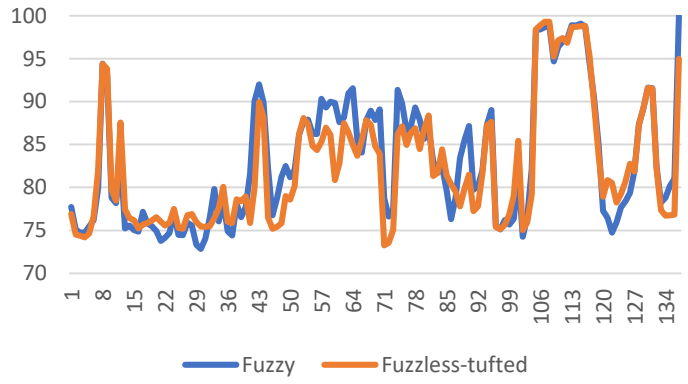

D11

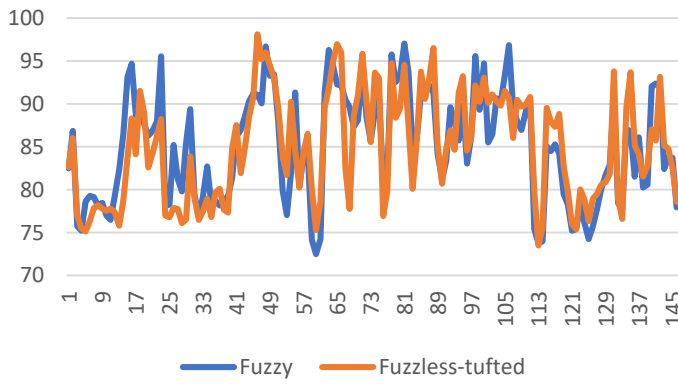

D12

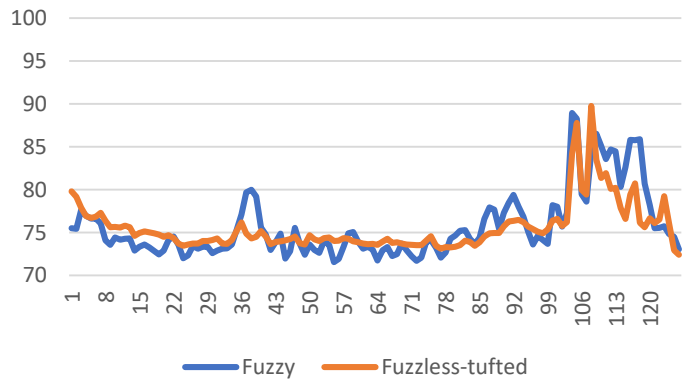

D13

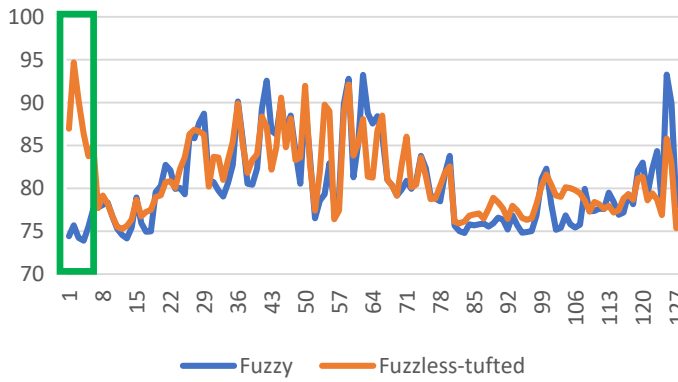

**Figure S2** Chromosomal distribution of SNP frequency in the pools of fuzzless-tufted and normal fuzzy segregants
