# Supplementary material
Source: publisher figshare collection journal article supplement (https://gsajournals.figshare.com/articles/dataset/_/13345268)
Supplement: Supplementary file 2 [file 1]

(A)

Gh\_D13G0096\_NAU ATGGCCCTCGAAATCTCTGAAATTAAGCAAGAGAGTCTATGGATGATGTTAGATCTAGC 60  
GH\_D13G0101\_ZJU ATGGCCCTCGAAATCTCTGAAATTAAGCAAGAGAGTCTATGGATGATGTTAGATCTAGC 60  
Ghir\_D13G001080.1\_HAU ATGGCCCTCGAAATCTCTGAAATTAAGCAAGAGAGTCTATGGATGATGTTAGATCTAGC 60  
Ghi\_D13G00466\_WHU ATGGCCCTCGAAATCTCTGAAATTAAGCAAGAGAGTCTATGGATGATGTTAGATCTAGC 60  
Ghi\_D13G00471\_WHU ATGGCCCTCGAAATCTCTGAAATTAAGCAAGAGAGTCTATGGATGATGTTAGATCTAGC 60  
Gohir\_D13G010300.1\_JGI ATGGCCCTCGAAATCTCTGAAATTAAGCAAGAGAGTCTATGGATGATGTTAGATCTAGC 60  
Gohir\_D13G010400.1\_JGI ATGGCCCTCGAAATCTCTGAAATTAAGCAAGAGAGTCTATGGATGATGTTAGATCTAGC 60  
Gohir\_D13G010500.1\_JGI ATGGCCCTCGAAATCTCTGAAATTAAGCAAGAGAGTCTATGGATGATGTTAGATCTAGC 60  
\*\*\*\*\*

Gh\_D13G0096\_NAU AATACTTCTCTCATCTCTAGTGCTAATGTCACCTGTGAAGAATTGCTCTAACATTAACCGA 120  
GH\_D13G0101\_ZJU AATACTTCTCTCATCTCTAGTGCTAATGTCACCTGTGAAGAATTGCTCTAACATTAACCGA 120  
Ghir\_D13G001080.1\_HAU AATACTTCTCTCATCTCTAGTGCTAATGTCACCTGTGAAGAATTGCTCTAACATTAACCGA 120  
Ghi\_D13G00466\_WHU AATACTTCTCTCATCTCTAGTGCTAATGTCACCTGTGAAGAATTGCTCTAACATTAACCGA 120  
Ghi\_D13G00471\_WHU AATACTTCTCTCATCTCTAGTGCTAATGTCACCTGTGAAGAATTGCTCTAACATTAACCGA 120  
Gohir\_D13G010300.1\_JGI AATACTTCTCTCATCTCTAGTGCTAATGTCACCTGTGAAGAATTGCTCTAACATTAACCGA 120  
Gohir\_D13G010400.1\_JGI AATACTTCTCTCATCTCTAGTGCTAATGTCACCTGTGAAGAATTGCTCTAACATTAACCGA 120  
Gohir\_D13G010500.1\_JGI AATACTTCTCTCATCTCTAGTGCTAATGTCACCTGTGAAGAATTGCTCTAACATTAACCGA 120  
\*\*\*\*\*

Gh\_D13G0096\_NAU AGTGCAAAGCATAATGAGGAACCTCGTCAGGGAGTGTCTCGGAAGAGAAGTTGACTGAA 180  
GH\_D13G0101\_ZJU AGTGCAAAGCATAATGAGGAACCTCGTCAGGGAGTGTCTCGGAAGAGAAGTTGACTGAA 180  
Ghir\_D13G001080.1\_HAU AGTGCAAAGCATAATGAGGAACCTCGTCAGGGAGTGTCTCGGAAGAGAAGTTGACTGAA 180  
Ghi\_D13G00466\_WHU AGTGCAAAGCATAATGAGGAACCTCGTCAGGGAGTGTCTCGGAAGAGAAGTTGACTGAA 180  
Ghi\_D13G00471\_WHU AGTGCAAAGCATAATGAGGAACCTCGTCAGGGAGTGTCTCGGAAGAGAAGTTGACTGAA 180  
Gohir\_D13G010300.1\_JGI AGTGCAAAGCATAATGAGGAACCTCGTCAGGGAGTGTCTCGGAAGAGAAGTTGACTGAA 180  
Gohir\_D13G010400.1\_JGI AGTGCAAAGCATAATGAGGAACCTCGTCAGGGAGTGTCTCGGAAGAGAAGTTGACTGAA 180  
Gohir\_D13G010500.1\_JGI AGTGCAAAGCATAATGAGGAACCTCGTCAGGGAGTGTCTCGGAAGAGAAGTTGACTGAA 180  
\*\*\*\*\*

Gh\_D13G0096\_NAU ACTGGCGAAGAAGAAAACCGAAGAGCATAGATTTGAATGTTGAGCTAACTCCGACAGGT 240  
GH\_D13G0101\_ZJU ACTGGCGAAGAAGAAAACCGAAGAGCATAGATTTGAATGTTGAGCTAACTCCGACAGGT 240  
Ghir\_D13G001080.1\_HAU ACTGGCGAAGAAGAAAACCGAAGAGCATAGATTTGAATGTTGAGCTAACTCCGACAGGT 240  
Ghi\_D13G00466\_WHU ACTGGCGAAGAAGAAAACCGAAGAGCATAGATTTGAATGTTGAGCTAACTCCGACAGGT 240  
Ghi\_D13G00471\_WHU ACTGGCGAAGAAGAAAACCGAAGAGCATAGATTTGAATGTTGAGCTAACTCCGACAGGT 240  
Gohir\_D13G010300.1\_JGI ACTGGCGAAGAAGAAAACCGAAGAGCATAGATTTGAATGTTGAGCTAACTCCGACAGGT 240  
Gohir\_D13G010400.1\_JGI ACTGGCGAAGAAGAAAACCGAAGAGCATAGATTTGAATGTTGAGCTAACTCCGACAGGT 240  
Gohir\_D13G010500.1\_JGI ACTGGCGAAGAAGAAAACCGAAGAGCATAGATTTGAATGTTGAGCTAACTCCGACAGGT 240  
\*\*\*\*\*

Gh\_D13G0096\_NAU CAACCCCCAAAAGATCGTTTATCTACTAACCGATCTCCGAGATCTCATCAACATCGCTA 300  
GH\_D13G0101\_ZJU CAACCCCCAAAAGATCGTTTATCTACTAACCGATCTCCGAGATCTCATCAACATCGCTA 300  
Ghir\_D13G001080.1\_HAU CAACCCCCAAAAGATCGTTTATCTACTAACCGATCTCCGAGATCTCATCAACATCGCTA 300  
Ghi\_D13G00466\_WHU CAACCCCCAAAAGATCGTTTATCTACTAACCGATCTCCGAGATCTCATCAACATCGCTA 300  
Ghi\_D13G00471\_WHU CAACCCCCAAAAGATCGTTTATCTACTAACCGATCTCCGAGATCTCATCAACATCGCTA 300  
Gohir\_D13G010300.1\_JGI CAACCCCCAAAAGATCGTTTATCTACTAACCGATCTCCGAGATCTCATCAACATCGCTA 300  
Gohir\_D13G010400.1\_JGI CAACCCCCAAAAGATCGTTTATCTACTAACCGATCTCCGAGATCTCATCAACATCGCTA 300  
Gohir\_D13G010500.1\_JGI CAACCCCCAAAAGATCGTTTATCTACTAACCGATCTCCGAGATCTCATCAACATCGCTA 300  
\*\*\*\*\*

Gh\_D13G0096\_NAU TCGGAAACGTCACCGATGCTTCTGAATCAACAAGACTCTTCTGGTGAAGAAGTTGAGTTC 360  
GH\_D13G0101\_ZJU TCGGAAACGTCACCGATGCTTCTGAATCAACAAGACTCTTCTGGTGAAGAAGTTGAGTTC 360  
Ghir\_D13G001080.1\_HAU TCGGAAACGTCACCGATGCTTCTGAATCAACAAGACTCTTCTGGTGAAGAAGTTGAGTTC 360  
Ghi\_D13G00466\_WHU TCGGAAACGTCACCGATGCTTCTGAATCAACAAGACTCTTCTGGTGAAGAAGTTGAGTTC 360  
Ghi\_D13G00471\_WHU TCGGAAACGTCACCGATGCTTCTGAATCAACAAGACTCTTCTGGTGAAGAAGTTGAGTTC 360  
Gohir\_D13G010300.1\_JGI TCGGAAACGTCACCGATGCTTCTGAATCAACAAGACTCTTCTGGTGAAGAAGTTGAGTTC 360  
Gohir\_D13G010400.1\_JGI TCGGAAACGTCACCGATGCTTCTGAATCAACAAGACTCTTCTGGTGAAGAAGTTGAGTTC 360  
Gohir\_D13G010500.1\_JGI TCGGAAACGTCACCGATGCTTCTGAATCAACAAGACTCTTCTGGTGAAGAAGTTGAGTTC 360  
\*\*\*\*\*

Gh\_D13G0096\_NAU AGCAACGCAACACCGGAGGAACCCGCACTTGTTCGATGGGTTGTACCCGTTGTTTAGTA 420  
GH\_D13G0101\_ZJU AGCAACGCAACACCGGAGGAACCCGCACTTGTTCGATGGGTTGTACCCGTTGTTTAGTA 420  
Ghir\_D13G001080.1\_HAU AGCAACGCAACACCGGAGGAACCCGCACTTGTTCGATGGGTTGTACCCGTTGTTTAGTA 420  
Ghi\_D13G00466\_WHU AGCAACGCAACACCGGAGGAACCCGCACTTGTTCGATGGGTTGTACCCGTTGTTTAGTA 420  
Ghi\_D13G00471\_WHU AGCAACGCAACACCGGAGGAACCCGCACTTGTTCGATGGGTTGTACCCGTTGTTTAGTA 420  
Gohir\_D13G010300.1\_JGI AGCAACGCAACACCGGAGGAACCCGCACTTGTTCGATGGGTTGTACCCGTTGTTTAGTA 420  
Gohir\_D13G010400.1\_JGI AGCAACGCAACACCGGAGGAACCCGCACTTGTTCGATGGGTTGTACCCGTTGTTTAGTA 420  
Gohir\_D13G010500.1\_JGI AGCAACGCAACACCGGAGGAACCCGCACTTGTTCGATGGGTTGTACCCGTTGTTTAGTA 420  
\*\*\*\*\*

Gh\_D13G0096\_NAU TTTGTGCTGACAAGTGAACCAACCCTAAGTGTGTCAATTGCCAAACCCCTGATCATCTT 480  
GH\_D13G0101\_ZJU TTTGTGCTGACAAGTGAACCAACCCTAAGTGTGTCAATTGCCAAACCCCTGATCATCTT 480  
Ghir\_D13G001080.1\_HAU TTTGTGCTGACAAGTGAACCAACCCTAAGTGTGTCAATTGCCAAACCCCTGATCATCTT 480  
Ghi\_D13G00466\_WHU TTTGTGCTGACAAGTGAACCAACCCTAAGTGTGTCAATTGCCAAACCCCTGATCATCTT 480  
Ghi\_D13G00471\_WHU TTTGTGCTGACAAGTGAACCAACCCTAAGTGTGTCAATTGCCAAACCCCTGATCATCTT 480  
Gohir\_D13G010300.1\_JGI TTTGTGCTGACAAGTGAACCAACCCTAAGTGTGTCAATTGCCAAACCCCTGATCATCTT 480  
Gohir\_D13G010400.1\_JGI TTTGTGCTGACAAGTGAACCAACCCTAAGTGTGTCAATTGCCAAACCCCTGATCATCTT 480  
Gohir\_D13G010500.1\_JGI TTTGTGCTGACAAGTGAACCAACCCTAAGTGTGTCAATTGCCAAACCCCTGATCATCTT 480  
\*\*\*\*\*

Gh\_D13G0096\_NAU ATTGATGTACTTCATTATAATCCCCCAAGAAACCAAGCATGTTTAG----- 528  
GH\_D13G0101\_ZJU ATTGATGTACTTCATTATAATCCCCCAAGAAACCAAGCATGTTTAG----- 528  
Ghir\_D13G001080.1\_HAU ATTGATGTACTTCATTATAATCCCCCAAGAAACCAAGCATGTTTAG----- 528  
Ghi\_D13G00466\_WHU ATTGATGTACTTCATTATAATCCCCCAAGAAACCAAGCATGTTTAG----- 528  
Ghi\_D13G00471\_WHU ATTGATGTACTTCATTATAATCCCCCAAGAAACCAAGCATGTTTAG----- 528  
Gohir\_D13G010300.1\_JGI ATTGATGTACTTCATTATAATCCCCCAAGAAACCAAGCATGTTTAG----- 528  
Gohir\_D13G010400.1\_JGI ATTGATGTACTTCATTATAATCCCCCAAGAAACCAAGCATGTTTAG----- 528  
Gohir\_D13G010500.1\_JGI ATTGATGTACTTCATTATAATCCCCCAAGAAACCAAGCATGTTTAGTTATTTTAA 528  
\*\*\*\*\*

(B)

|                        |                                                              |     |
|------------------------|--------------------------------------------------------------|-----|
| Ghir_D13G001100.1_HAU  | -----                                                        | 0   |
| Ghir_D13G001110.1_HAU  | ATGGAGTCCCCGCCGCTCTTTCTCTACTTTCCGGTCTTACCTCAGGGCCTTGGCTCAA   | 60  |
| Gh_D13G0098_NAU        | ATGGAGTCCCCGCCGCTCTTTCTCTACTTTCCGGTCTTACCTCAGGGCCTTGGCTCAA   | 60  |
| GH_D13G0103_ZJU        | ATGGAGTCCCCGCCGCTCTTTCTCTACTTTCCGGTCTTACCTCAGGGCCTTGGCTCAA   | 60  |
| Ghi_D13G00481_WHU      | ATGGAGTCCCCGCCGCTCTTTCTCTACTTTCCGGTCTTACCTCAGGGCCTTGGCTCAA   | 60  |
| Gohir.D13G010600.1_JGI | ATGGAGTCCCCGCCGCTCTTTCTCTACTTTCCGGTCTTACCTCAGGGCCTTGGCTCAA   | 60  |
| Lig197-1               | *****                                                        | 60  |
| Ghir_D13G001100.1_HAU  | -----                                                        | 0   |
| Ghir_D13G001110.1_HAU  | ACTCCATCTCGTTTCGCTCATCGGGCACCCCTCTGTTTCTTCCATATGAAGAGTTAAGT  | 120 |
| Gh_D13G0098_NAU        | ACTCCATCTCGTTTCGCTCATCGGGCACCCCTCTGTTTCTTCCATATGAAGAGTTAAGT  | 120 |
| GH_D13G0103_ZJU        | ACTCCATCTCGTTTCGCTCATCGGGCACCCCTCTGTTTCTTCCATATGAAGAGTTAAGT  | 120 |
| Ghi_D13G00481_WHU      | ACTCCATCTCGTTTCGCTCATCGGGCACCCCTCTGTTTCTTCCATATGAAGAGTTAAGT  | 120 |
| Gohir.D13G010600.1_JGI | ACTCCATCTCGTTTCGCTCATCGGGCACCCCTCTGTTTCTTCCATATGAAGAGTTAAGT  | 120 |
| Lig197-1               | *****                                                        | 120 |
| Ghir_D13G001100.1_HAU  | -----                                                        | 0   |
| Ghir_D13G001110.1_HAU  | TGGGTCAAGTCCCGTCCGGCTCCAATATGCACAAGTCCCTCCGATGGTACGACTTAAT   | 180 |
| Gh_D13G0098_NAU        | TGGGTCAAGTCCCGTCCGGCTCCAATATGCACAAGTCCCTCCGATGGTACGACTTAAT   | 180 |
| GH_D13G0103_ZJU        | TGGGTCAAGTCCCGTCCGGCTCCAATATGCACAAGTCCCTCCGATGGTACGACTTAAT   | 180 |
| Ghi_D13G00481_WHU      | TGGGTCAAGTCCCGTCCGGCTCCAATATGCACAAGTCCCTCCGATGGTACGACTTAAT   | 180 |
| Gohir.D13G010600.1_JGI | TGGGTCAAGTCCCGTCCGGCTCCAATATGCACAAGTCCCTCCGATGGTACGACTTAAT   | 180 |
| Lig197-1               | *****                                                        | 180 |
| Ghir_D13G001100.1_HAU  | -----                                                        | 0   |
| Ghir_D13G001110.1_HAU  | GGTCTTGAATAGGAGGTATGGTCGGAGCTGGTGTTCGTCACCTACCGGAAGAGTAGT    | 240 |
| Gh_D13G0098_NAU        | GGTCTTGAATAGGAGGTATGGTCGGAGCTGGTGTTCGTCACCTACCGGAAGAGTAGT    | 240 |
| GH_D13G0103_ZJU        | GGTCTTGAATAGGAGGTATGGTCGGAGCTGGTGTTCGTCACCTACCGGAAGAGTAGT    | 240 |
| Ghi_D13G00481_WHU      | GGTCTTGAATAGGAGGTATGGTCGGAGCTGGTGTTCGTCACCTACCGGAAGAGTAGT    | 240 |
| Gohir.D13G010600.1_JGI | GGTCTTGAATAGGAGGTATGGTCGGAGCTGGTGTTCGTCACCTACCGGAAGAGTAGT    | 240 |
| Lig197-1               | *****                                                        | 240 |
| Ghir_D13G001100.1_HAU  | -----                                                        | 0   |
| Ghir_D13G001110.1_HAU  | CGTCTCTATGCTGGCCCTGCAATCTTAATCTCTTACGCCATTGCTGGTCTTTGTGCTCTC | 300 |
| Gh_D13G0098_NAU        | CGTCTCTATGCTGGCCCTGCAATCTTAATCTCTTACGCCATTGCTGGTCTTTGTGCTCTC | 300 |
| GH_D13G0103_ZJU        | CGTCTCTATGCTGGCCCTGCAATCTTAATCTCTTACGCCATTGCTGGTCTTTGTGCTCTC | 300 |
| Ghi_D13G00481_WHU      | CGTCTCTATGCTGGCCCTGCAATCTTAATCTCTTACGCCATTGCTGGTCTTTGTGCTCTC | 300 |
| Gohir.D13G010600.1_JGI | CGTCTCTATGCTGGCCCTGCAATCTTAATCTCTTACGCCATTGCTGGTCTTTGTGCTCTC | 300 |
| Lig197-1               | *****                                                        | 300 |
| Ghir_D13G001100.1_HAU  | -----                                                        | 0   |
| Ghir_D13G001110.1_HAU  | CTTTCCGCTTTCTGTACTACTGAGTTCGCTGTCCATATGCCCGTCGCGGGCGCGCTTT   | 360 |
| Gh_D13G0098_NAU        | CTTTCCGCTTTCTGTACTACTGAGTTCGCTGTCCATATGCCCGTCGCGGGCGCGCTTT   | 360 |
| GH_D13G0103_ZJU        | CTTTCCGCTTTCTGTACTACTGAGTTCGCTGTCCATATGCCCGTCGCGGGCGCGCTTT   | 360 |
| Ghi_D13G00481_WHU      | CTTTCCGCTTTCTGTACTACTGAGTTCGCTGTCCATATGCCCGTCGCGGGCGCGCTTT   | 360 |
| Gohir.D13G010600.1_JGI | CTTTCCGCTTTCTGTACTACTGAGTTCGCTGTCCATATGCCCGTCGCGGGCGCGCTTT   | 360 |
| Lig197-1               | *****                                                        | 360 |
| Ghir_D13G001100.1_HAU  | -----                                                        | 0   |
| Ghir_D13G001110.1_HAU  | AGTTACCTACGTATCACATTCGGTGAGTTCGCAGCGTTTTTAACCGGAGCCAATCTGATA | 420 |
| Gh_D13G0098_NAU        | AGTTACCTACGTATCACATTCGGTGAGTTCGCAGCGTTTTTAACCGGAGCCAATCTGATA | 420 |
| GH_D13G0103_ZJU        | AGTTACCTACGTATCACATTCGGTGAGTTCGCAGCGTTTTTAACCGGAGCCAATCTGATA | 420 |
| Ghi_D13G00481_WHU      | AGTTACCTACGTATCACATTCGGTGAGTTCGCAGCGTTTTTAACCGGAGCCAATCTGATA | 420 |
| Gohir.D13G010600.1_JGI | AGTTACCTACGTATCACATTCGGTGAGTTCGCAGCGTTTTTAACCGGAGCCAATCTGATA | 420 |
| Lig197-1               | *****                                                        | 420 |
| Ghir_D13G001100.1_HAU  | -----                                                        | 0   |
| Ghir_D13G001110.1_HAU  | ATGGAATACGTAATGTCAAACGCCGCCGTTGCTAGAGGCTTACCTCTTATTTAAGCGCC  | 480 |
| Gh_D13G0098_NAU        | ATGGAATACGTAATGTCAAACGCCGCCGTTGCTAGAGGCTTACCTCTTATTTAAGCGCC  | 480 |
| GH_D13G0103_ZJU        | ATGGAATACGTAATGTCAAACGCCGCCGTTGCTAGAGGCTTACCTCTTATTTAAGCGCC  | 480 |
| Ghi_D13G00481_WHU      | ATGGAATACGTAATGTCAAACGCCGCCGTTGCTAGAGGCTTACCTCTTATTTAAGCGCC  | 480 |
| Gohir.D13G010600.1_JGI | ATGGAATACGTAATGTCAAACGCCGCCGTTGCTAGAGGCTTACCTCTTATTTAAGCGCC  | 480 |
| Lig197-1               | *****                                                        | 480 |
| Ghir_D13G001100.1_HAU  | -----                                                        | 0   |
| Ghir_D13G001110.1_HAU  | GCAATCGGTATACCCACCGCAAAAATGGCGGTTTACAGCTGCGGCTCTCCAAAAGGGTTC | 540 |
| Gh_D13G0098_NAU        | GCAATCGGTATACCCACCGCAAAAATGGCGGTTTACAGCTGCGGCTCTCCAAAAGGGTTC | 540 |
| GH_D13G0103_ZJU        | GCAATCGGTATACCCACCGCAAAAATGGCGGTTTACAGCTGCGGCTCTCCAAAAGGGTTC | 540 |
| Ghi_D13G00481_WHU      | GCAATCGGTATACCCACCGCAAAAATGGCGGTTTACAGCTGCGGCTCTCCAAAAGGGTTC | 540 |
| Gohir.D13G010600.1_JGI | GCAATCGGTATACCCACCGCAAAAATGGCGGTTTACAGCTGCGGCTCTCCAAAAGGGTTC | 540 |
| Lig197-1               | *****                                                        | 540 |

```

Ghir_D13G001100.1_HAU ----- 0
Ghir_D13G001110.1_HAU ----- 600
Gh_D13G0098_NAU ----- 600
GH_D13G0103_ZJU ----- 600
Ghi_D13G00481_WHU ----- 600
Gohir.D13G010600.1_JGI ----- 600
Lig197-1 ----- 600
AACGAAATTGACTTGTGGCCGTCGCCGTCGTATTAACCGTCACTCTCATAATCTGTTAC
AACGAAATTGACTTGTGGCCGTCGCCGTCGTATTAACCGTCACTCTCATAATCTGTTAC
AACGAAATTGACTTGTGGCCGTCGCCGTCGTATTAACCGTCACTCTCATAATCTGTTAC
AACGAAATTGACTTGTGGCCGTCGCCGTCGTATTAACCGTCACTCTCATAATCTGTTAC
AACGAAATTGACTTGTGGCCGTCGCCGTCGTATTAACCGTCACTCTCATAATCTGTTAC
*****

Ghir_D13G001100.1_HAU ----- 0
Ghir_D13G001110.1_HAU ----- 660
Gh_D13G0098_NAU ----- 660
GH_D13G0103_ZJU ----- 660
Ghi_D13G00481_WHU ----- 660
Gohir.D13G010600.1_JGI ----- 660
Lig197-1 ----- 660
AGTACAAGGAAAGTTC AATACTGAACATGATACTCACCACATTACATATCCTTTTCATA
AGTACAAGGAAAGTTC AATACTGAACATGATACTCACCACATTACATATCCTTTTCATA
AGTACAAGGAAAGTTC AATACTGAACATGATACTCACCACATTACATATCCTTTTCATA
AGTACAAGGAAAGTTC AATACTGAACATGATACTCACCACATTACATATCCTTTTCATA
AGTACAAGGAAAGTTC AATACTGAACATGATACTCACCACATTACATATCCTTTTCATA
*****

Ghir_D13G001100.1_HAU ----- 0
Ghir_D13G001110.1_HAU ----- 720
Gh_D13G0098_NAU ----- 720
GH_D13G0103_ZJU ----- 720
Ghi_D13G00481_WHU ----- 720
Gohir.D13G010600.1_JGI ----- 720
Lig197-1 ----- 720
ATCTTTGTAGTATTAATGGGTTTTGGAGAGGGGATTGGAATAAATTCCTCGTCCAATG
ATCTTTGTAGTATTAATGGGTTTTGGAGAGGGGATTGGAATAAATTCCTCGTCCAATG
ATCTTTGTAGTATTAATGGGTTTTGGAGAGGGGATTGGAATAAATTCCTCGTCCAATG
ATCTTTGTAGTATTAATGGGTTTTGGAGAGGGGATTGGAATAAATTCCTCGTCCAATG
ATCTTTGTAGTATTAATGGGTTTTGGAGAGGGGATTGGAATAAATTCCTCGTCCAATG
*****

Ghir_D13G001100.1_HAU ----- 0
Ghir_D13G001110.1_HAU ----- 780
Gh_D13G0098_NAU ----- 780
GH_D13G0103_ZJU ----- 780
Ghi_D13G00481_WHU ----- 780
Gohir.D13G010600.1_JGI ----- 780
Lig197-1 ----- 780
AACCCTAACAGCCCTCCGGTTTCCTTCCTACGGACCTCCGGTGTCTCAATGGTGCC
AACCCTAACAGCCCTCCGGTTTCCTTCCTACGGACCTCCGGTGTCTCAATGGTGCC
AACCCTAACAGCCCTCCGGTTTCCTTCCTACGGACCTCCGGTGTCTCAATGGTGCC
AACCCTAACAGCCCTCCGGTTTCCTTCCTACGGACCTCCGGTGTCTCAATGGTGCC
AACCCTAACAGCCCTCCGGTTTCCTTCCTACGGACCTCCGGTGTCTCAATGGTGCC
*****

Ghir_D13G001100.1_HAU ----- 0
Ghir_D13G001110.1_HAU ----- 840
Gh_D13G0098_NAU ----- 840
GH_D13G0103_ZJU ----- 840
Ghi_D13G00481_WHU ----- 840
Gohir.D13G010600.1_JGI ----- 840
Lig197-1 ----- 840
GCCATGGTTTACTTCAGTTACATTGGATACGACGCGGTATCCACCATGGCTGAGGAAGTA
GCCATGGTTTACTTCAGTTACATTGGATACGACGCGGTATCCACCATGGCTGAGGAAGTA
GCCATGGTTTACTTCAGTTACATTGGATACGACGCGGTATCCACCATGGCTGAGGAAGTA
GCCATGGTTTACTTCAGTTACATTGGATACGACGCGGTATCCACCATGGCTGAGGAAGTA
GCCATGGTTTACTTCAGTTACATTGGATACGACGCGGTATCCACCATGGCTGAGGAAGTA
*****

Ghir_D13G001100.1_HAU ----- 0
Ghir_D13G001110.1_HAU ----- 900
Gh_D13G0098_NAU ----- 900
GH_D13G0103_ZJU ----- 900
Ghi_D13G00481_WHU ----- 900
Gohir.D13G010600.1_JGI ----- 900
Lig197-1 ----- 900
AGGTACCCGATCAAAGACATTC CATTGGAGTAACAGGCTCCGTCGTTATCGTCACCATT
AGGTACCCGATCAAAGACATTC CATTGGAGTAACAGGCTCCGTCGTTATCGTCACCATT
AGGTACCCGATCAAAGACATTC CATTGGAGTAACAGGCTCCGTCGTTATCGTCACCATT
AGGTACCCGATCAAAGACATTC CATTGGAGTAACAGGCTCCGTCGTTATCGTCACCATT
AGGTACCCGATCAAAGACATTC CATTGGAGTAACAGGCTCCGTCGTTATCGTCACCATT
AGGTACCCGATCAAAGACATTC CATTGGAGTAACAGGCTCCGTCGTTATCGTCACCATT
*****

Ghir_D13G001100.1_HAU ----- 0
Ghir_D13G001110.1_HAU ----- 960
Gh_D13G0098_NAU ----- 951
GH_D13G0103_ZJU ----- 951
Ghi_D13G00481_WHU ----- 951
Gohir.D13G010600.1_JGI ----- 951
Lig197-1 ----- 960
CTGTATTGTCTCATGGCCGCTTCCATGTCCATGCTCCTCCCTACGACATG CTAGTACTT
CTGTATTGTCTCATGGCCGCTTCCATGTCCATGCTCCTCCCTACGACATG-----
CTGTATTGTCTCATGGCCGCTTCCATGTCCATGCTCCTCCCTACGACATG-----
CTGTATTGTCTCATGGCCGCTTCCATGTCCATGCTCCTCCCTACGACATG-----
CTGTATTGTCTCATGGCCGCTTCCATGTCCATGCTCCTCCCTACGACATG-----
CTGTATTGTCTCATGGCCGCTTCCATGTCCATGCTCCTCCCTACGACATG CTAGTACTT
*****#####

Ghir_D13G001100.1_HAU ----- 0
Ghir_D13G001110.1_HAU ----- 1020
Gh_D13G0098_NAU ----- 951
GH_D13G0103_ZJU ----- 951
Ghi_D13G00481_WHU ----- 951
Gohir.D13G010600.1_JGI ----- 951
Lig197-1 ----- 1020
CTAACTTTTGTTCATGTTTGGTTGTGTATCATTTGGTCAACTACTTGCCAAGCACGG
-----
-----
-----
CTAACTTTTGTTCATGTTTGGTTGTGTATCATTTGGTCAACTACTTGCCAAGCACGG
#####

Ghir_D13G001100.1_HAU ----- 0
Ghir_D13G001110.1_HAU ----- 1032
Gh_D13G0098_NAU ----- 1009
GH_D13G0103_ZJU ----- 1009
Ghi_D13G00481_WHU ----- 1009
Gohir.D13G010600.1_JGI ----- 1009
Lig197-1 ----- 1080
AGATCGATGTAG-----
--ATCGATGTAGAGGCGCCATTTCGCGCGCGCTTCAGTGGGAGGTGGGAGTGGGTGTCTGA
--ATCGATGTAGAGGCGCCATTTCGCGCGCGCTTCAGTGGGAGGTGGGAGTGGGTGTCTGA
--ATCGATGTAGAGGCGCCATTTCGCGCGCGCTTCAGTGGGAGGTGGGAGTGGGTGTCTGA
--ATCGATGTAGAGGCGCCATTTCGCGCGCGCTTCAGTGGGAGGTGGGAGTGGGTGTCTGA
AGATCGATGTAGAGGCGCCATTTCGCGCGCGCTTCAGTGGGAGGTGGGAGTGGGTGTCTGA
#####

```

|                        |                                                                                                                                                         |      |
|------------------------|---------------------------------------------------------------------------------------------------------------------------------------------------------|------|
| Ghir_D13G001100.1_HAU  | -----                                                                                                                                                   | 0    |
| Ghir_D13G001110.1_HAU  | -----                                                                                                                                                   | 1032 |
| Gh_D13G0098_NAU        | AGGTGATCGGAGTGGGGGCCAGTTTCGGGATATCGACGTCGTTGCTGGTGCCGATGTTGG                                                                                            | 1069 |
| GH_D13G0103_ZJU        | AGGTGATCGGAGTGGGGGCCAGTTTCGGGATATCGACGTCGTTGCTGGTGCCGATGTTGG                                                                                            | 1069 |
| Ghi_D13G00481_WHU      | AGGTGATCGGAGTGGGGGCCAGTTTCGGGATATCGACGTCGTTGCTGGTGCCGATGTTGG                                                                                            | 1069 |
| Gohir.D13G010600.1_JGI | AGGTGATCGGAGTGGGGGCCAGTTTCGGGATATCGACGTCGTTGCTGGTGCCGATGTTGG                                                                                            | 1069 |
| Lig197-1               | AGGTGATCGGAGTGGGGGCCAGTTTCGGGATATCGACGTCGTTGCTGGTGCCG <b>ATGTTGG</b><br>^^^^^^^^^^^^^^^^^^^^^^^^^^^^^^^^^^^^^^^^^^^^^^^^^^^^^^^^^^^^^^^^^^^^^^^^        | 1140 |
| Ghir_D13G001100.1_HAU  | -----                                                                                                                                                   | 0    |
| Ghir_D13G001110.1_HAU  | -----                                                                                                                                                   | 1032 |
| Gh_D13G0098_NAU        | GCCAGGCTAGGTACATGTGCGTCATTGGACGTTCAAGCGTGGTCCCGGCATGGTTCCGCA                                                                                            | 1129 |
| GH_D13G0103_ZJU        | GCCAGGCTAGGTACATGTGCGTCATTGGACGTTCAAGCGTGGTCCCGGCATGGTTCCGCA                                                                                            | 1129 |
| Ghi_D13G00481_WHU      | GCCAGGCTAGGTACATGTGCGTCATTGGACGTTCAAGCGTGGTCCCGGCATGGTTCCGCA                                                                                            | 1129 |
| Gohir.D13G010600.1_JGI | GCCAGGCTAGGTACATGTGCGTCATTGGACGTTCAAGCGTGGTCCCGGCATGGTTCCGCA                                                                                            | 1129 |
| Lig197-1               | GCCAGGCTAGGTACATGTGCGTCATTGGACGTTCAAGCGTGGTCCCGGCATGGTTCCGCA<br>^^^^^^^^^^^^^^^^^^^^^^^^^^^^^^^^^^^^^^^^^^^^^^^^^^^^^^^^^^^^^^^^^^^^^^^^                | 1200 |
| Ghir_D13G001100.1_HAU  | -----ATGGGAATTTTCACAG                                                                                                                                   | 16   |
| Ghir_D13G001110.1_HAU  | -----                                                                                                                                                   | 1032 |
| Gh_D13G0098_NAU        | GGGTGCATTCTAAAACATCTACGCCCTCTCAATGCCTCCGCTTTTCTCGGAATTTTCACAG                                                                                           | 1189 |
| GH_D13G0103_ZJU        | GGGTGCATTCTAAAACATCTACGCCCTCTCAATGCCTCCGCTTTTCTCGGAATTTTCACAG                                                                                           | 1189 |
| Ghi_D13G00481_WHU      | GGGTGCATTCTAAAACATCTACGCCCTCTCAATGCCTCCGCTTTTCTCGGAATTTTCACAG                                                                                           | 1189 |
| Gohir.D13G010600.1_JGI | GGGTGCATTCTAAAACATCTACGCCCTCTCAATGCCTCCGCTTTTCTCGGAATTTTCACAG                                                                                           | 1189 |
| Lig197-1               | GGGTGCATTCTAAAACATCTACGCCCTCTCAATGCCTCCGCTTTTCTCGGAATTTTCACAG<br>^^^^^^^^^^^^^^^^^^^^^^^^^^^^^^^^^^^^^^^^^^^^^^^^^^^^^^^^^^^^^^^^^^^^^^^^ *****         | 1260 |
| Ghir_D13G001100.1_HAU  | CTGCCATTGCCCTTTTCACTGATCTAAACATCCTCTTGAACCTCATATCCATTGGCACAC                                                                                            | 76   |
| Ghir_D13G001110.1_HAU  | -----                                                                                                                                                   | 1032 |
| Gh_D13G0098_NAU        | CTGCCATTGCCCTTTTCACTGATCTAAACATCCTCTTGAACCTCATATCCATTGGCACAC                                                                                            | 1249 |
| GH_D13G0103_ZJU        | CTGCCATTGCCCTTTTCACTGATCTAAACATCCTCTTGAACCTCATATCCATTGGCACAC                                                                                            | 1249 |
| Ghi_D13G00481_WHU      | CTGCCATTGCCCTTTTCACTGATCTAAACATCCTCTTGAACCTCATATCCATTGGCACAC                                                                                            | 1249 |
| Gohir.D13G010600.1_JGI | CTGCCATTGCCCTTTTCACTGATCTAAACATCCTCTTGAACCTCATATCCATTGGCACAC                                                                                            | 1249 |
| Lig197-1               | CTGCCATTGCCCTTTTCACTGATCTAAACATCCTCTTGAACCTCATATCCATTGGCACAC<br>^^^^^^^^^^^^^^^^^^^^^^^^^^^^^^^^^^^^^^^^^^^^^^^^^^^^^^^^^^^^^^^^^^^^^^^^ *****          | 1320 |
| Ghir_D13G001100.1_HAU  | TCTTTGTCTATTACATGGTCGCAAACGCCGTAATCTACAGGCGATATGTCGTTATCGGGA                                                                                            | 136  |
| Ghir_D13G001110.1_HAU  | -----                                                                                                                                                   | 1032 |
| Gh_D13G0098_NAU        | TCTTTGTCTATTACATGGTCGCAAACGCCGTAATCTACAGGCGATATGTCGTTATCGGGA                                                                                            | 1309 |
| GH_D13G0103_ZJU        | TCTTTGTCTATTACATGGTCGCAAACGCCGTAATCTACAGGCGATATGTCGTTATCGGGA                                                                                            | 1309 |
| Ghi_D13G00481_WHU      | TCTTTGTCTATTACATGGTCGCAAACGCCGTAATCTACAGGCGATATGTCGTTATCGGGA                                                                                            | 1309 |
| Gohir.D13G010600.1_JGI | TCTTTGTCTATTACATGGTCGCAAACGCCGTAATCTACAGGCGATATGTCGTTATCGGGA                                                                                            | 1309 |
| Lig197-1               | TCTTTGTCTATTACATGGTCGCAAACGCCGTAATCTACAGGCGATATGTCGTTATCGGGA<br>^^^^^^^^^^^^^^^^^^^^^^^^^^^^^^^^^^^^^^^^^^^^^^^^^^^^^^^^^^^^^^^^^^^^^^^^ *****          | 1380 |
| Ghir_D13G001100.1_HAU  | TAACAAAGCCGTGGCCAATATATTATCCTTCCTATGCCTATTGACCCCTCACTTCCTTCCTAT                                                                                         | 196  |
| Ghir_D13G001110.1_HAU  | -----                                                                                                                                                   | 1032 |
| Gh_D13G0098_NAU        | TAACAAAGCCGTGGCCAATATATTATCCTTCCTATGCCTATTGACCCCTCACTTCCTTCCTAT                                                                                         | 1369 |
| GH_D13G0103_ZJU        | TAACAAAGCCGTGGCCAATATATTATCCTTCCTATGCCTATTGACCCCTCACTTCCTTCCTAT                                                                                         | 1369 |
| Ghi_D13G00481_WHU      | TAACAAAGCCGTGGCCAATATATTATCCTTCCTATGCCTATTGACCCCTCACTTCCTTCCTAT                                                                                         | 1369 |
| Gohir.D13G010600.1_JGI | TAACAAAGCCGTGGCCAATATATTATCCTTCCTATGCCTATTGACCCCTCACTTCCTTCCTAT                                                                                         | 1369 |
| Lig197-1               | TAACAAAGCCGTGGCCAATATATTATCCTTCCTATGCCTATTGACCCCTCACTTCCTTCCTAT<br>^^^^^^^^^^^^^^^^^^^^^^^^^^^^^^^^^^^^^^^^^^^^^^^^^^^^^^^^^^^^^^^^^^^^^^^^ *****       | 1440 |
| Ghir_D13G001100.1_HAU  | TCACCCGTGCGTGCCATTTTGCACCCCTCAGGGAGTTCGAAGTCCTTTCTACTCGGCCTAT                                                                                           | 256  |
| Ghir_D13G001110.1_HAU  | -----                                                                                                                                                   | 1032 |
| Gh_D13G0098_NAU        | TCACCCGTGCGTGCCATTTTGCACCCCTCAGGGAGTTCGAAGTCCTTTCTACTCGGCCTAT                                                                                           | 1429 |
| GH_D13G0103_ZJU        | TCACCCGTGCGTGCCATTTTGCACCCCTCAGGGAGTTCGAAGTCCTTTCTACTCGGCCTAT                                                                                           | 1429 |
| Ghi_D13G00481_WHU      | TCACCCGTGCGTGCCATTTTGCACCCCTCAGGGAGTTCGAAGTCCTTTCTACTCGGCCTAT                                                                                           | 1429 |
| Gohir.D13G010600.1_JGI | TCACCCGTGCGTGCCATTTTGCACCCCTCAGGGAGTTCGAAGTCCTTTCTACTCGGCCTAT                                                                                           | 1429 |
| Lig197-1               | TCACCCGTGCGTGCCATTTTGCACCCCTCAGGGAGTTCGAAGTCCTTTCTACTCGGCCTAT<br>^^^^^^^^^^^^^^^^^^^^^^^^^^^^^^^^^^^^^^^^^^^^^^^^^^^^^^^^^^^^^^^^^^^^^^^^ *****         | 1500 |
| Ghir_D13G001100.1_HAU  | GTATCGGACTCGCCACAGCTATAAACAATAATTTTTCGTCACACGGTACC GCAAGTGCCGA                                                                                          | 316  |
| Ghir_D13G001110.1_HAU  | -----                                                                                                                                                   | 1032 |
| Gh_D13G0098_NAU        | GTATCGGACTCGCCACAGCTATAAACAATAATTTTTCGTCACACGGTACC GCAAGTGCCGA                                                                                          | 1489 |
| GH_D13G0103_ZJU        | GTATCGGACTCGCCACAGCTATAAACAATAATTTTTCGTCACACGGTACC GCAAGTGCCGA                                                                                          | 1489 |
| Ghi_D13G00481_WHU      | GTATCGGACTCGCCACAGCTATAAACAATAATTTTTCGTCACACGGTACC GCAAGTGCCGA                                                                                          | 1489 |
| Gohir.D13G010600.1_JGI | GTATCGGACTCGCCACAGCTATAAACAATAATTTTTCGTCACACGGTACC GCAAGTGCCGA                                                                                          | 1489 |
| Lig197-1               | GTATCGGACTCGCCACAGCTATAAACAATAATTTTTCGTCACACGGTACC GCAAGTGCCGA<br>^^^^^^^^^^^^^^^^^^^^^^^^^^^^^^^^^^^^^^^^^^^^^^^^^^^^^^^^^^^^^^^^^^^^^^^^ *****        | 1560 |
| Ghir_D13G001100.1_HAU  | AACCCGAATTTTGGGGGTACCTTTTCATGCTTGGCTACCATCTATATCA-TCTTCA <b>TGA</b>                                                                                     | 375  |
| Ghir_D13G001110.1_HAU  | -----                                                                                                                                                   | 1032 |
| Gh_D13G0098_NAU        | AACCCGAATTTTGGGGGTACCTTTTCATGCTTGGCTACCATCTATATCA <b>AT</b> CCTTCATGA                                                                                   | 1549 |
| GH_D13G0103_ZJU        | AACCCGAATTTTGGGGGTACCTTTTCATGCTTGGCTACCATCTATATCA <b>AT</b> CCTTCATGA                                                                                   | 1549 |
| Ghi_D13G00481_WHU      | AACCCGAATTTTGGGGGTACCTTTTCATGCTTGGCTACCATCTATATCA <b>AT</b> CCTTCATGA                                                                                   | 1549 |
| Gohir.D13G010600.1_JGI | AACCCGAATTTTGGGGGTACCTTTTCATGCTTGGCTACCATCTATATCA <b>AT</b> CCTTCATGA                                                                                   | 1549 |
| Lig197-1               | AACCCGAATTTTGGGGGTACCTTTTCATGCTTGGCTACCATCTATATCA <b>AT</b> CCTTCATGA<br>^^^^^^^^^^^^^^^^^^^^^^^^^^^^^^^^^^^^^^^^^^^^^^^^^^^^^^^^^^^^^^^^^^^^^^^^ ***** | 1620 |

|                        |                                                                          |      |
|------------------------|--------------------------------------------------------------------------|------|
| Ghir_D13G001100.1_HAU  | -----                                                                    | 375  |
| Ghir_D13G001110.1_HAU  | -----                                                                    | 1032 |
| Gh_D13G0098_NAU        | ATATATTTCTGTTGGGATCTTTGGATGGACTGTCGTATGTCCGGTTCGGGTTCTTTTCGG             | 1609 |
| GH_D13G0103_ZJU        | ATATATTTCTGTTGGGATCTTTGGATGGACTGTCGTATGTCCGGTTCGGGTTCTTTTCGG             | 1609 |
| Ghi_D13G00481_WHU      | ATATATTTCTGTTGGGATCTTTGGATGGACTGTCGTATGTCCGGTTCGGGTTCTTTTCGG             | 1609 |
| Gohir.D13G010600.1_JGI | ATATATTTCTGTTGGGATCTTTGGATGGACTGTCGTATGTCCGGTTCGGGTTCTTTTCGG             | 1609 |
| Lig197-1               | ATATATTTCTGTTGGGATCTTTGGATGGACTGTCGTATGTCCGGTTCGGGTTCTTTTCGG             | 1680 |
|                        | ^^^^^^^^^^^^^^^^^^^^^^^^^^^^^^^^^^^^^^^^^^^^^^^^^^^^^^^^^^^^^^^^^^^^^^^^ |      |
| Ghir_D13G001100.1_HAU  | -----                                                                    | 375  |
| Ghir_D13G001110.1_HAU  | -----                                                                    | 1032 |
| Gh_D13G0098_NAU        | GTCTAGCGGTACTCGTATATGTCTTGTACAGTGTTTCATGCTAGCTTTGATGCTGAAGCAG            | 1669 |
| GH_D13G0103_ZJU        | GTCTAGCGGTACTCGTATATGTCTTGTACAGTGTTTCATGCTAGCTTTGATGCTGAAGCAG            | 1669 |
| Ghi_D13G00481_WHU      | GTCTAGCGGTACTCGTATATGTCTTGTACAGTGTTTCATGCTAGCTTTGATGCTGAAGCAG            | 1669 |
| Gohir.D13G010600.1_JGI | GTCTAGCGGTACTCGTATATGTCTTGTACAGTGTTTCATGCTAGCTTTGATGCTGAAGCAG            | 1669 |
| Lig197-1               | GTCTAGCGGTACTCGTATATGTCTTGTACAGTGTTTCATGCTAGCTTTGATGCTGAAGCAG            | 1740 |
|                        | ^^^^^^^^^^^^^^^^^^^^^^^^^^^^^^^^^^^^^^^^^^^^^^^^^^^^^^^^^^^^^^^^^^^^^^^^ |      |
| Ghir_D13G001100.1_HAU  | -----                                                                    | 375  |
| Ghir_D13G001110.1_HAU  | -----                                                                    | 1032 |
| Gh_D13G0098_NAU        | AGGGATTTTtaggtgTAAAGAATGGTGAATGATCAGAGAATCAACAGAAAGTGAAGAAG              | 1729 |
| GH_D13G0103_ZJU        | AGGGATTTTtaggtgTAAAGAATGGTGAATGATCAGAGAATCAACAGAAAGTGAAGAAG              | 1729 |
| Ghi_D13G00481_WHU      | AGGGATTTTtaggtgTAAAGAATGGTGAATGATCAGAGAATCAACAGAAAGTGAAGAAG              | 1729 |
| Gohir.D13G010600.1_JGI | AGGGATTTTtaggtgTAAAGAATGGTGAATGATCAGAGAATCAACAGAAAGTGAAGAAG              | 1729 |
| Lig197-1               | AGGGATTTTtaggtgTAAAGAATGGTGAATGATCAGAGAATCAACAGAAAGTGAAGAAG              | 1800 |
|                        | ^^^^^^^^^^^^^^^^^^^^^^^^^^^^^^^^^^^^^^^^^^^^^^^^^^^^^^^^^^^^^^^^^^^^^^^^ |      |
| Ghir_D13G001100.1_HAU  | -----                                                                    | 375  |
| Ghir_D13G001110.1_HAU  | -----                                                                    | 1032 |
| Gh_D13G0098_NAU        | ACCCAAATCACAAGGTGTAA                                                     | 1749 |
| GH_D13G0103_ZJU        | ACCCAAATCACAAGGTGTAA                                                     | 1749 |
| Ghi_D13G00481_WHU      | ACCCAAATCACAAGGTGTAA                                                     | 1749 |
| Gohir.D13G010600.1_JGI | ACCCAAATCACAAGGTGTAA                                                     | 1749 |
| Lig197-1               | ACCCAAATCACAAGGTGTAA                                                     | 1820 |
|                        | ^^^^^^^^^^^^^^^^^^^^^^^^^^^^^^^^^^^^^^^^^^^^^^^^^^^^^^^^^^^^^^^^^^^^^^^^ |      |

**Figure S5.** Alignment of the two DEGs at the  $N_5$  locus from different versions of TM-1

- (A) Alignment of the coding sequences of *D13G0096* and their counterparts in the published *G. hirsutum* genomes.
- (B) Alignment of the coding sequences of *D13G0098* and their counterparts in the published *G. hirsutum* genomes. The 1<sup>st</sup> intron annotated in *D13G0098* and retained in the cDNA clone (Lig197-1) is highlighted in green. The 2<sup>nd</sup> ORF of the cDNA clone (Lig197-1), which is different from the annotated *Ghir\_D13G001100.1\_HAU*, is highlighted in yellow.
