# Supplementary material
Source: publisher figshare collection journal article supplement (https://gsajournals.figshare.com/articles/dataset/_/13345268)
Supplement: Supplementary file 3 [file 1]

|             |                                                                                      |      |
|-------------|--------------------------------------------------------------------------------------|------|
| D13G0096    | AATAATAATATTTATTTTCTTTTTTATAAAAATAATTTACAGTTTTTTTTTCTAACTAGGT                        | 60   |
| D13G0096_N5 | AATAATAATATTTATTTTCTTTTTTATAAAAATAATTTACAGTTTTTTTTTCTAACTAGGT<br>*****               | 60   |
| D13G0096    | TAGTGTCTGATTATTTTATCAAACCAATACACTTAGAACATTATAGTAGTATAGATTTA                          | 120  |
| D13G0096_N5 | TAGTGTCTGATTATTTTATCAAACCAATACACTTAGAACATTATAGTAGTATAGATTTA<br>*****                 | 120  |
| D13G0096    | ATATATTGTTAGTGTATAAATATATGGGAAAATATTTAGTATATTGTCAGTGGAGTTTCT                         | 180  |
| D13G0096_N5 | ATATATTGTTAGTGTATAAATATATGGGAAAATATTTAGTATATTGTCAGTGGAGTTTCT<br>*****                | 180  |
| D13G0096    | AGACTCCACAAGTAAAAATTAGAGGGTTGACAAGTGTCTATAGATGCATAATAAAATATT                         | 240  |
| D13G0096_N5 | AGACTCCACAAGTAAAAATTAGAGGGTTGACAAGTGTCTATAGATGCATAATAAAATATT<br>*****                | 240  |
| D13G0096    | AAAAAGAAATGTTTTAAAAAGACACGTGATAATTTTTAAAAATTGCTTGTAATAAAAA                           | 300  |
| D13G0096_N5 | AAAAAGAAATGTTTTAAAAAGACACGTGATAATTTTTAAAAATTGCTTGTAATAAAAA<br>*****                  | 300  |
| D13G0096    | AATACAATGCTAGTATACCAAATACTAATCCAAAATATATACACGAAAAAATTAECTACA                         | 360  |
| D13G0096_N5 | AATACAATGCTAGTATACCAAATACTAATCCAAAATATATACACGAAAAAATTAECTACA<br>*****                | 360  |
| D13G0096    | TAATGTCACCTATTTAAAAGTTTAACTATTTGTATTTATTTGAAGGTGTTTTTCAATGA                          | 420  |
| D13G0096_N5 | TAATGTCACCTATTTAAAAGTTTAACTATTTGTATTTATTTGAAGGTGTTTTTCAATGA<br>*****                 | 420  |
| D13G0096    | GGTGTTAAGGATATTTTAAAGATGTCATCATGTGCTTAAAAATTAGGTATATAAATTTAT                         | 480  |
| D13G0096_N5 | GGTGTTAAGGATATTTTAAAGATGTCATCATGTGCTTAAAAATTAGGTATATAAATTTAT<br>*****                | 480  |
| D13G0096    | TTATTAATGTATATTAATACAAAAATTTCTCACATTTGTTAAAAAATTCATTAATT                             | 540  |
| D13G0096_N5 | TTATTAATGTATATTAATACAAAAATTTCTCACATTTGTTAAAAAATTCATTAATT<br>*****                    | 540  |
| D13G0096    | TTTTTCTTTGCCAAAGTTGGTGTATTATAATCTAATATAAATTCATAGTTATTTTTAA                           | 600  |
| D13G0096_N5 | TTTTTCTTTGCCAAAGTTGGTGTATTATAATCTAATATAAATTCATAGTTATTTTTAA<br>*****                  | 600  |
| D13G0096    | TGGAACCTCTTTCTTATTTACTTTTACTTGCAAATTCAAAAAATAAATTTTATGGG                             | 660  |
| D13G0096_N5 | TGGAACCTCTTTCTTATTTACTTTTACTTGCAAATTCAAAAAATAAATTTTATGGG<br>*****                    | 660  |
| D13G0096    | AAATTTACAATTTTGAACATAAACTTGATTACTATAAATTATTTGGTACATTGACGATGA                         | 720  |
| D13G0096_N5 | AAATTTACAATTTTGAACATAAACTTGATTACTATAAATTATTTGGTACATTGACGATGA<br>*****                | 720  |
| D13G0096    | AAAATTTAACTTCACAAATTTGAAATTTGCTCTGTACTTAAATTCATTTAAAAAAT                             | 780  |
| D13G0096_N5 | AAAATTTAACTTCACAAATTTGAAATTTGCTCTGTACTTAAATTCATTTAAAAAAT<br>*****                    | 780  |
| D13G0096    | TTTA-AAAAAATAAGAGATGTCAAATCTCAACCTTACTTATGCGTTACAAATCTTCGT                           | 839  |
| D13G0096_N5 | TTTA <sup>A</sup> AAAAAATAAGAGATGTCAAATCTCAACCTTACTTATGCGTTACAAATCTTCGT<br>*** ***** | 840  |
| D13G0096    | CGCTGTACAAAATAATTACCCCTATTATTATTATTATTATTATTATTATTATTACCTACT                         | 899  |
| D13G0096_N5 | CGCTGTACAAAATAATTACCCCTATTATTATTATTATTATTATTATTATTATTACCTACT<br>*****                | 900  |
| D13G0096    | CATTGTTCTCTATAAACTATGTCCTCTCACTACTCAATTCTCTATAAATTGTGAGTAAT                          | 959  |
| D13G0096_N5 | CATTGTTCTCTATAAACTATGTCCTCTCACTACTCAATTCTCTATAAATTGTGAGTAAT<br>*****                 | 960  |
| D13G0096    | CAAAGTTGAAAGAGTCTATTATCTTTTCTAATTTCAATCA <sup>ATG</sup> CCCTCTGAAATCTCTG             | 1019 |
| D13G0096_N5 | CAAAGTTGAAAGAGTCTATTATCTTTTCTAATTTCAATCA <sup>ATG</sup> CCCTCTGAAATCTCTG<br>*****    | 1020 |
| D13G0096    | AAATTAAGCAAGAGAGTCTATGGATGATGTTAGATCTAGCAATACTTCTCTCATCTCTA                          | 1079 |
| D13G0096_N5 | AAATTAAGCAAGAGAGTCTATGGATGATGTTAGATCTAGCAATACTTCTCTCATCTCTA<br>*****                 | 1080 |
| D13G0096    | GTGCTAATGTCACCTGTGAAGAATTGCTCTAACATTAACCGAAGTGCAAGCATAATGAGG                         | 1139 |
| D13G0096_N5 | GTGCTAATGTCACCTGTGAAGAATTGCTCTAACATTAACCGAAGTGCAAGCATAATGAGG<br>*****                | 1140 |

|             |                                                                             |      |
|-------------|-----------------------------------------------------------------------------|------|
| D13G0096    | TAAACTATTAGCCGATTTAAATTTCTTATATATGTATTCTTTATATAGTAGATTATTCAT                | 1199 |
| D13G0096_N5 | TAAACTATTAGCCGATTTAAATTTCTTATATATGTATTCTTTATATAGTAGATTATTCAT<br>*****       | 1200 |
| D13G0096    | GTCCAATTTATCAATTTTAAACCCCTCTTCTTCTTTTGTAAAGATTCTTCGAGAAGTCTG                | 1259 |
| D13G0096_N5 | GTCCAATTTATCAATTTTAAACCCCTCTTCTTCTTTTGTAAAGATTCTTCGAGAAGTCTG<br>*****       | 1260 |
| D13G0096    | AGTAAATGATTGAAATCCAGTGAAATTTGACGATACTCTTAATAAAGAAATTCATTTCAA                | 1319 |
| D13G0096_N5 | AGTAAATGATTGAAATCCAGTGAAATTTGACGATACTCTTAATAAAGAAATTCATTTCAA<br>*****       | 1320 |
| D13G0096    | TTTATCAACTTTTATGTTTCCGTGTTTTTTTTTCTTTTTTAAAGAACCTCGTCAGGG                   | 1379 |
| D13G0096_N5 | TTTATCAACTTTTATGTTTCCGTGTTTTTTTTTCTTTTTTAAAGAACCTCGTCAGGG<br>*****          | 1380 |
| D13G0096    | AGTTGCTCGGAAGAGAAGTTTACTGAACTGGCGAAGAAGAAAACGGGAAGCATAGA                    | 1439 |
| D13G0096_N5 | AGTTGCTCGGAAGAGAAGTTTACTGAACTGGCGAAGAAGAAAACGGGAAGCATAGA<br>*****           | 1440 |
| D13G0096    | TTTGAATGTTGAGCTAACTCCGACAGGTCAACCCCAAAAAGATCGTTTATCTACTAACC                 | 1499 |
| D13G0096_N5 | TTTGAATGTTGAGCTAACTCCGACAGGTCAACCCCAAAAAGATCGTTTATCTACTAACC<br>*****        | 1500 |
| D13G0096    | ATCTTCGGAGATCTCATCAACATCGCTATCGGAAACGTCACGCATGCTTCTGAATCAACA                | 1559 |
| D13G0096_N5 | ATCTTCGGAGATCTCATCAACATCGCTATCGGAAACGTCACGCATGCTTCTGAATCAACA<br>*****       | 1560 |
| D13G0096    | AGACTCTTCTGGTGAAGAAGTTGAGTTCAGCAACGCAACACCCGGAGGAACCGCCACTTGT               | 1619 |
| D13G0096_N5 | AGACTCTTCTGGTGAAGAAGTTGAGTTCAGCAACGCAACACCCGGAGGAACCGCCACTTGT<br>*****      | 1620 |
| D13G0096    | TGCGATGGGTTGTACCCGTTGTTTAGTATTTGTGCTGACAAGTGAACCAACCCCTAAGTG                | 1679 |
| D13G0096_N5 | TGCGATGGGTTGTACCCGTTGTTTAGTATTTGTGCTGACAAGTGAACCAACCCCTAAGTG<br>*****       | 1680 |
| D13G0096    | TGTC AATTGCCAAACCCCTGATCATCTTATTGATGTACTTCATTATAATCCCCCAAGAA                | 1739 |
| D13G0096_N5 | TGTC AATTGCCAAACCCCTGATCATCTTATTGATGTACTTCATTATAATCCCCCAAGAA<br>*****       | 1740 |
| D13G0096    | ACCAAAGCATGTT <b>TAG</b> TTTATTTAATTTAATGTTGTCTCCAAACTATATAGGCAAGA          | 1799 |
| D13G0096_N5 | ACCAAAGCATGTT <b>TAG</b> TTTATTTAATTTAATGTTGTCTCCAAACTATATAGGCAAGA<br>***** | 1800 |
| D13G0096    | TGTTGCTCTCTTAGGCTTTAATTTAATTTAATGTTGTTATGCATAAGTTATTGCTGTT                  | 1859 |
| D13G0096_N5 | TGTTGCTCTCTTAGGCTTTAATTTAATTTAATGTTGTTATGCATAAGTTATTGCTGTT<br>*****         | 1860 |
| D13G0096    | TTAGGTTTAAAGTTAAGTTAATGTTGTTGTCCAAACCTATATATGTAGTTTGGTTCTTT                 | 1919 |
| D13G0096_N5 | TTAGGTTTAAAGTTAAGTTAATGTTGTTGTCCAAACCTATATATGTAGTTTGGTTCTTT<br>*****        | 1920 |
| D13G0096    | TAATGCAATATATTACTCTATGTATTTCTCTTTCCTTCTAAACTCTTGTTAAATTAAGG                 | 1979 |
| D13G0096_N5 | TAATGCAATATATTACTCTATGTATTTCTCTTTCCTTCTAAACTCTTGTTAAATTAAGG<br>*****        | 1980 |
| D13G0096    | GATCATTTTAAAAATAAATTTAAAAATAAAAAGGACCAGAGTCCAAATACATTAGGAGGAAA              | 2039 |
| D13G0096_N5 | GATCATTTTAAAAATAAATTTAAAAATAAAAAGGACCAGAGTCCAAATACATTAGGAGGAAA<br>*****     | 2040 |
| D13G0096    | AAATGTTAAAAAATATGTAACCTATTGGGTGCTAATAAGTTACTAATAAAAATATTTTGT                | 2099 |
| D13G0096_N5 | AAATGTTAAAAAATATGTAACCTATTGGGTGCTAATAAGTTACTAATAAAAATATTTTGT<br>*****       | 2100 |
| D13G0096    | TAGTTTTTACTTAATTCAATTTAAAAACCAAAGGAAAACCTATTTTAAAAATGGGTAAACTA              | 2159 |
| D13G0096_N5 | TAGTTTTTACTTAATTCAATTTAAAAACCAAAGGAAAACCTATTTTAAAAATGGGTAAACTA<br>*****     | 2160 |
| D13G0096    | TACTATTAGTCATTAATCTATAGGTAATTTTCATTTTGGTTACTTAATTTTAAAAAGTT                 | 2219 |
| D13G0096_N5 | TACTATTAGTCATTAATCTATAGGTAATTTTCATTTTGGTTACTTAATTTTAAAAAGTT<br>*****        | 2220 |
| D13G0096    | TAAGTCATTGAACTATTGAGAAGTTTAAATTTAAGTCACTGGGCTGTTAAATTTTTTTTT                | 2279 |
| D13G0096_N5 | TAAGTCATTGAACTATTGAGAAGTTTAAATTTAAGTCACTGGGCTGTTAAATTTTTTTTT<br>*****       | 2280 |

|             |                                                                                   |      |
|-------------|-----------------------------------------------------------------------------------|------|
| D13G0096    | TGAAAGTTTCGCCAATGAATCCAAGCGACAATCAACGACCGGTACGATGAATCAATAC                        | 2339 |
| D13G0096_N5 | TGAAAGTTTCGCCAATGAATCCAAGCGACAATCAACGACCGGTACGATGAATCAATAC<br>*****               | 2340 |
| D13G0096    | TTATCGACGAGTAGAAGAATATACTCTAGATCCAAGTTGATTTAATGGTGAGTGTGAGAG                      | 2399 |
| D13G0096_N5 | TTATCGACGAGTAGAAGAATATACTCTAGATCCAAGTTGATTTAATGGTGAGTGTGAGAG<br>*****             | 2400 |
| D13G0096    | ATTGGAAAA-AAAACTGTTTGAATTTTGATTTGCAGATTTGTGATGTCTAAAGTTATGAT                      | 2458 |
| D13G0096_N5 | ATTGGAAAA <del>AAAA</del> CTGTTTGAATTTTGATTTGCAGATTTGTGATGTCTAAAGTTATGAT<br>***** | 2460 |
| D13G0096    | AATTAATAATTTAATTTACAATTATTAGTTAAAAAGTATTAGAATGATAAGTGTGTTTAA                      | 2518 |
| D13G0096_N5 | AATTAATAATTTAATTTACAATTATTAGTTAAAAAGTATTAGAATGATAAGTGTGTTTAA<br>*****             | 2520 |
| D13G0096    | TTCTCAATGTTCTGCTTCCTCAATTTTCTAGTTGCATTTTGGGTCAGTGGTAGTGTG                         | 2578 |
| D13G0096_N5 | TTCTCAATGTTCTGCTTCCTCAATTTTCTAGTTGCATTTTGG <del>TC</del> AGTGGTAGTGTG<br>*****    | 2578 |
| D13G0096    | TTTTCCCTCGAGCCATTTGGTGAGAACTTCAATTCAACAATAGTTCTCTCAATATGCTT                       | 2638 |
| D13G0096_N5 | TTTTCCCTCGAGCCATTTGGTGAGAACTTCAATTCAACAATAGTTCTCTCAATATGCTT<br>*****              | 2638 |
| D13G0096    | AGTGTCTCTAATGAGCCTTGGGTCTACTTAACGAGGGAAGGAGATGGTAGTAAGTATTT                       | 2698 |
| D13G0096_N5 | AGTGTCTCTAATGAGCCTTGGGTCTACTTAACGAGGGAAGGAGATGGTAGTAAGTATTT<br>*****              | 2698 |
| D13G0096    | TCCATGGACCTTTTCAGTATGCTTGACAAATTCGCCTAAATCGAATTCACCATTTC                          | 2755 |
| D13G0096_N5 | TCCATGGACCTTTTCAGTATGCTTGACAAATTCGCCTAAATCGAATTCACCATTTC<br>*****                 | 2755 |

**Figure S4.** Alignment of *Gh\_D13G0096* from TM-1 and the fuzzless-tufted mutant
