# Supplementary material
Source: publisher figshare collection journal article supplement (https://gsajournals.figshare.com/articles/dataset/_/13345268)
Supplement: Supplementary file 4 [file 1]

### A01

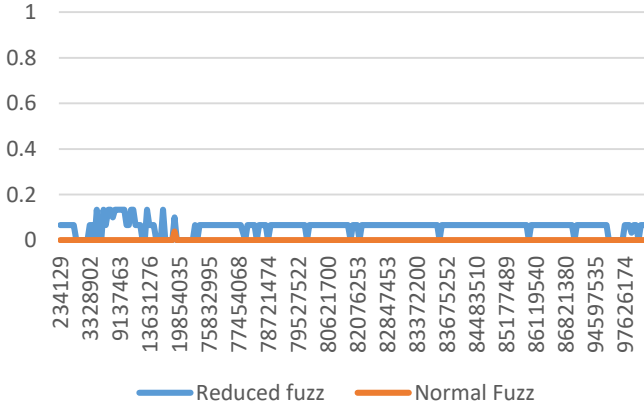

### A02

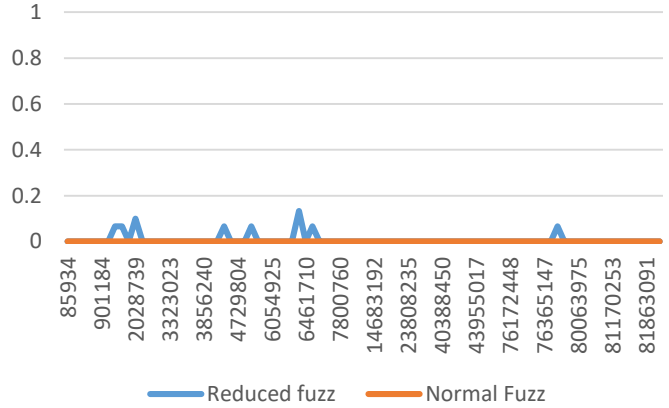

### A03

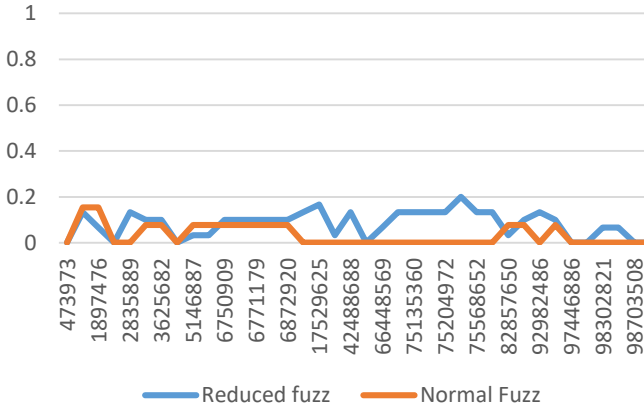

### A04

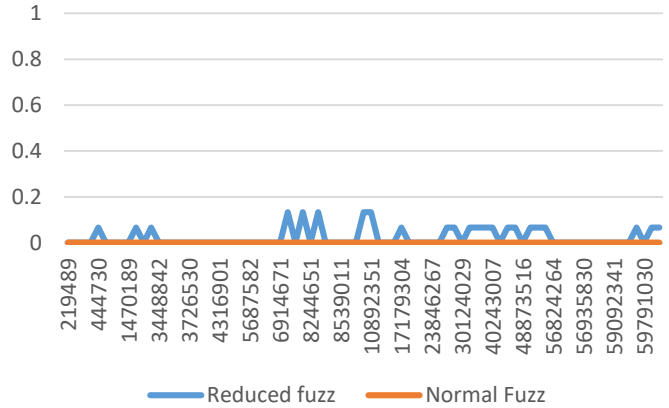

### A05

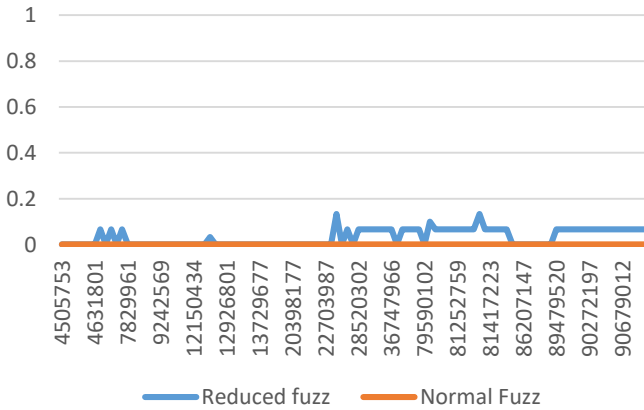

### A06

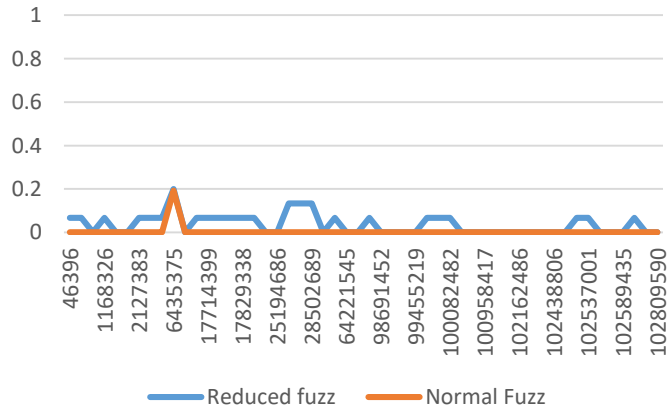

### A07

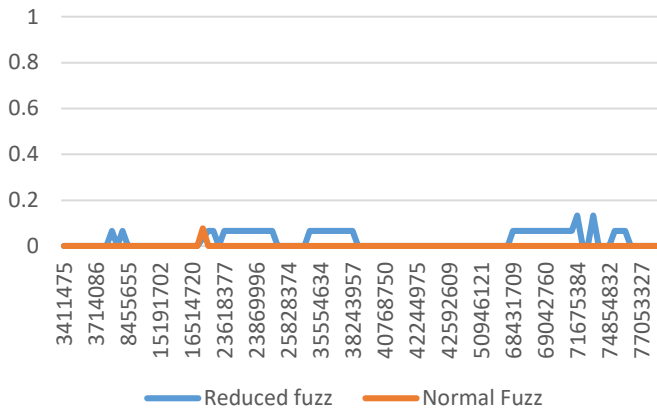

### A08

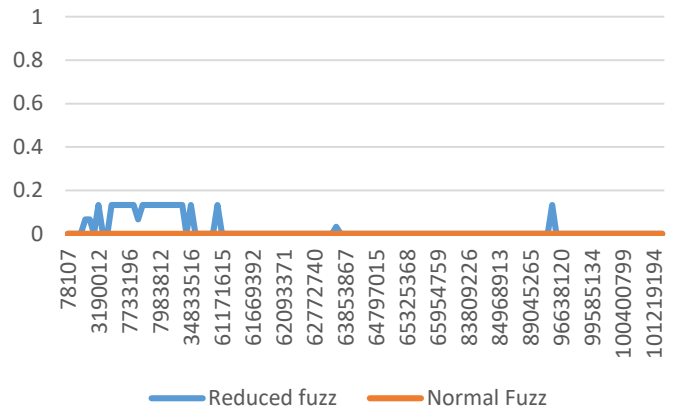

### A09

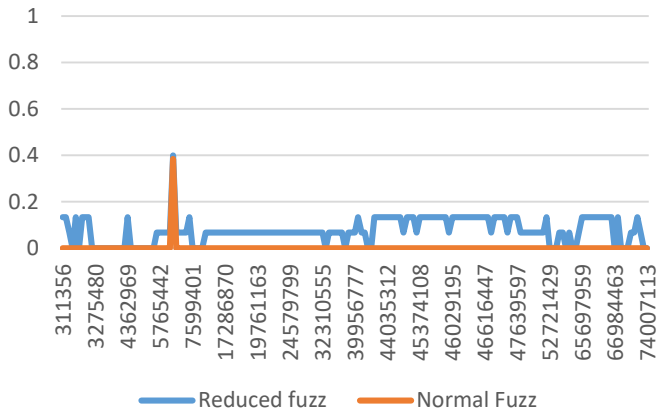

### A10

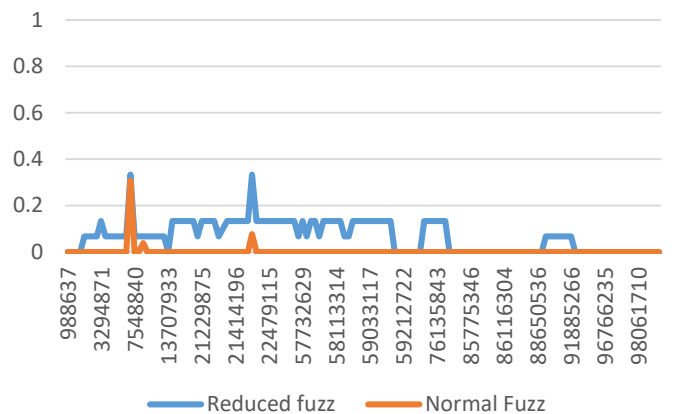

### A11

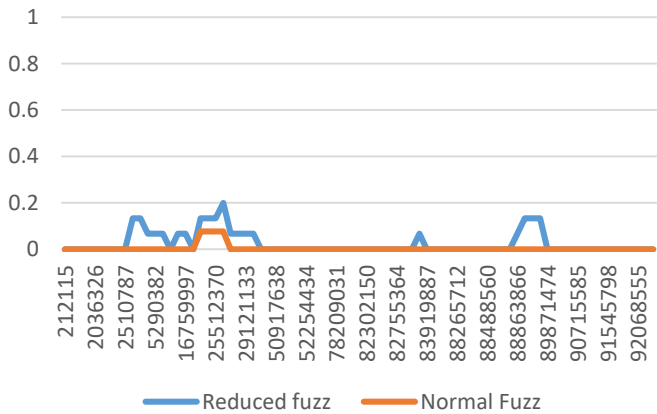

### A12

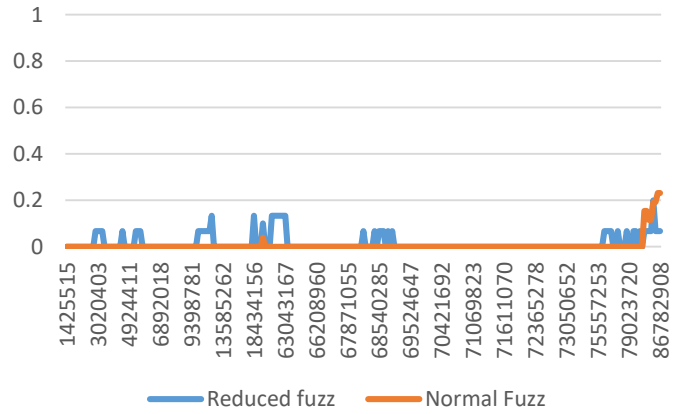

### A13

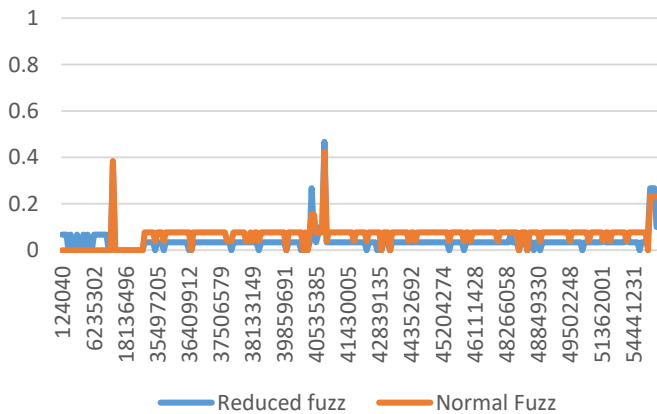

### D01

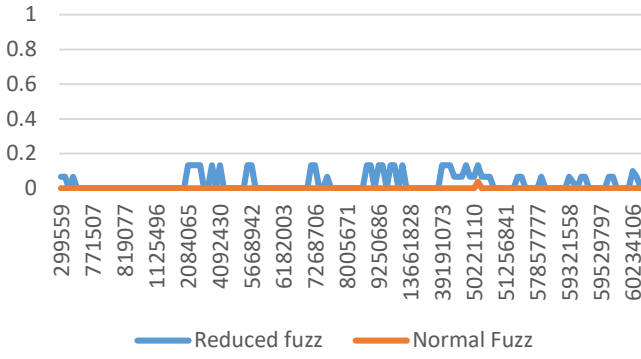

### D02

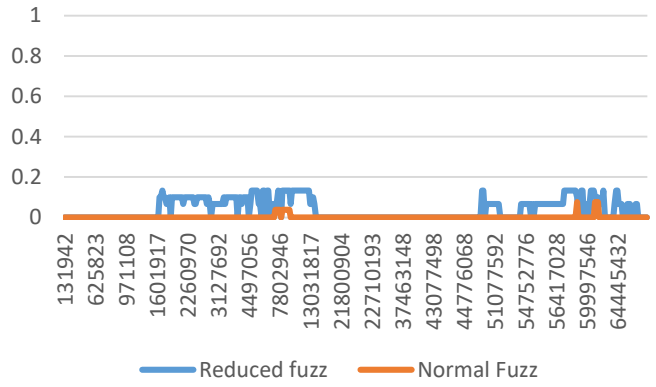

### D03

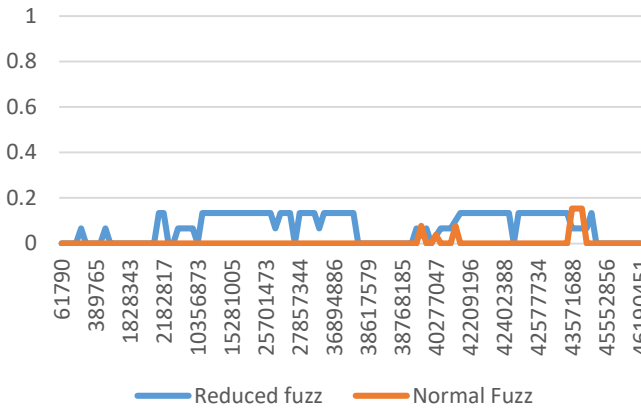

### D04

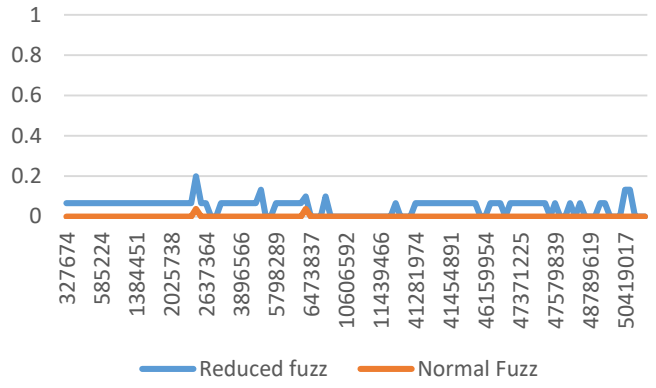

### D05

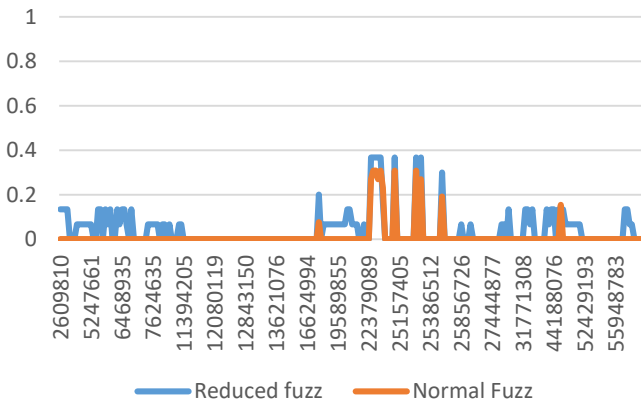

### D06

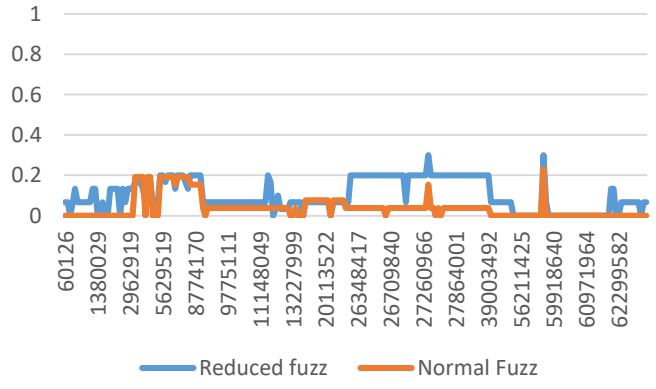

### D07

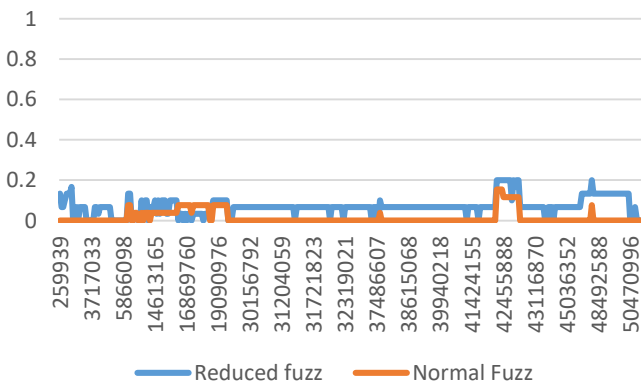

### D08

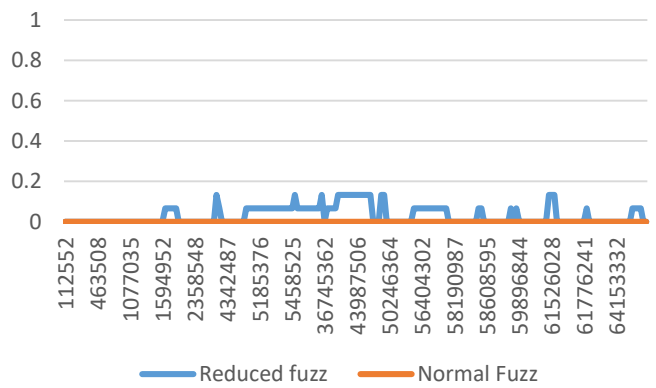

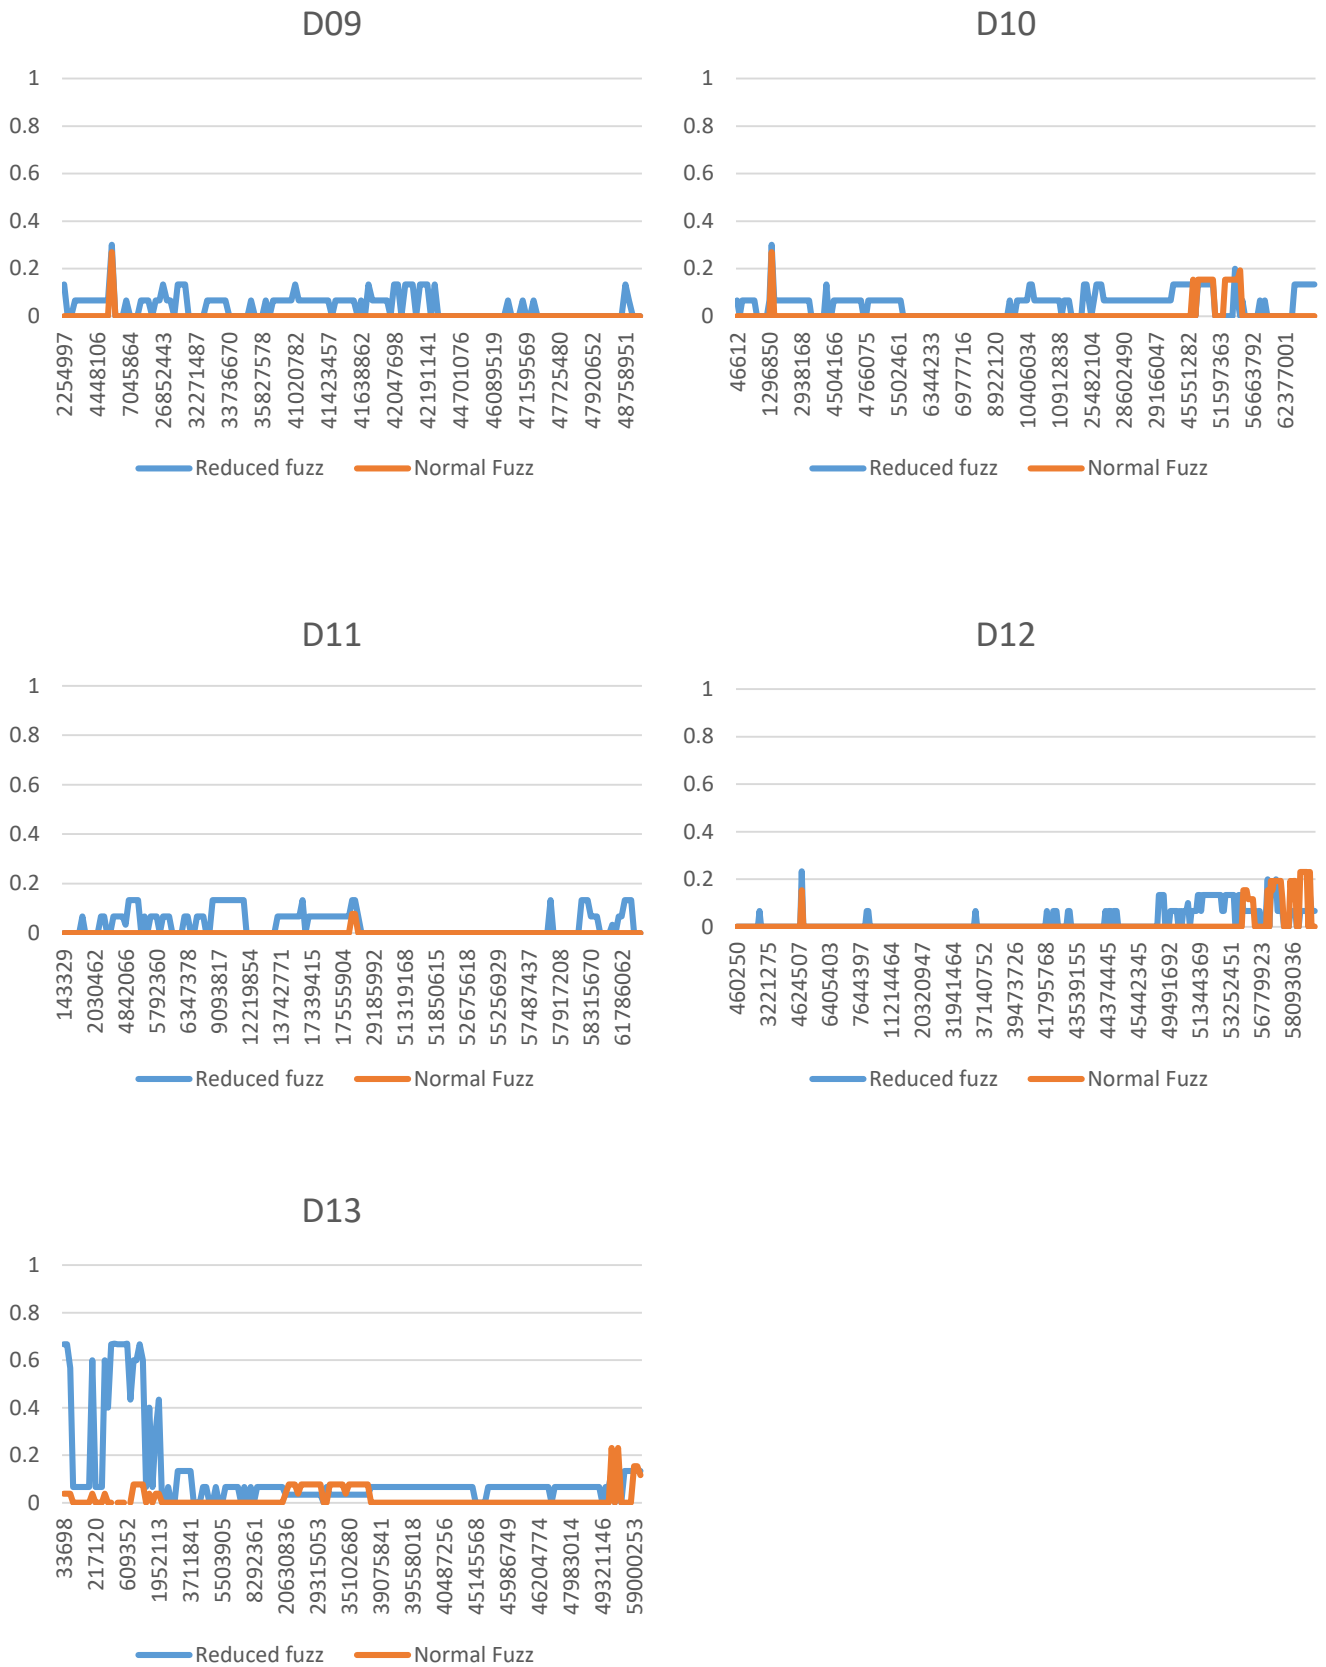

**Figure S1** SNP chip based frequency of the mutant alleles across the 26 cotton chromosomes
