# Supplementary material
Source: publisher figshare collection journal article supplement (https://gsajournals.figshare.com/articles/dataset/_/13345268)
Supplement: Supplementary file 5 [file 1]

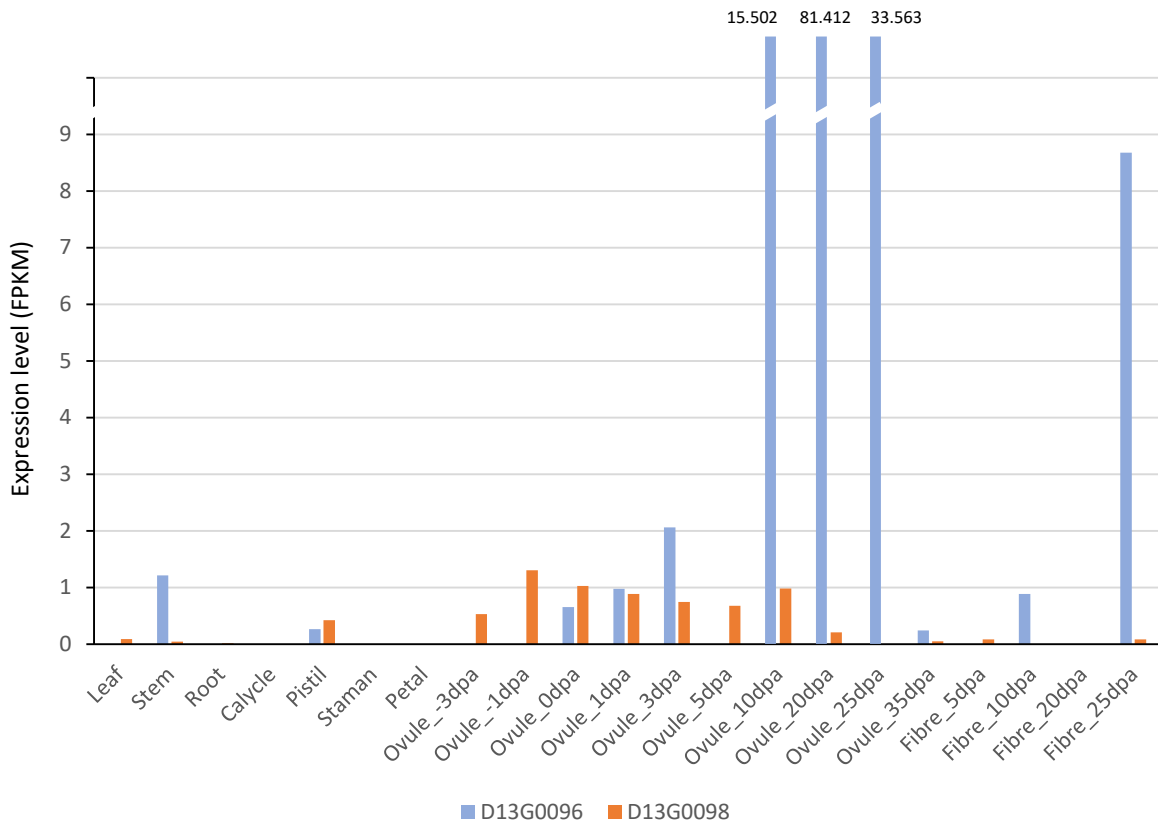

**Figure S3.** The expression level (FPKM) of *D13G0096* and *D13G0098* in vegetative and reproductive tissues, and ovule and fibre. Data were extracted from <http://structuralbiology.cau.edu.cn/gossypium/> that were reported by Zhang et al. 2015.
