# Supplementary material
Source: publisher figshare collection journal article supplement (https://gsajournals.figshare.com/articles/dataset/_/13345268)
Supplement: Supplementary file 6 [file 1]

(A)

|                |                                                                                         |     |
|----------------|-----------------------------------------------------------------------------------------|-----|
| Gh_D13G0089    | MEKLCVVPERLKRVEESHIDDLPSLSSLLQLFLSLPQIHQLISELAAEPSTQAGLCG                               | 60  |
| Gh_D13G0089_N5 | MEKLCVVPERLKRVEESHIDDLPSLSSLLQLFLSLPQIHQLISELAAEPSTQAGLCG<br>*****                      | 60  |
| Gh_D13G0089    | KNEGAALDLKQGNQCYSSGDHSQALRCYSQALRLAPIDAHTTGKNLVATLYLNRASLFH                             | 120 |
| Gh_D13G0089_N5 | KNEGAALDLKQGNQCYSSGDHSQALRCYSQALRLAPIDAHTTGKNLVATLYLNRASLFH<br>*****                    | 120 |
| Gh_D13G0089    | KMGLPMESLRDCSRALEISPCYPKVWYRRGKVNATLGNVEDSVHDLVSAKDMEPSIGGKK                            | 180 |
| Gh_D13G0089_N5 | KMGLPMESLRDCSRALEISPCYPKVWYRRGKVNATLGNVEDSVHDLVSAKDMEPSIGGKK<br>*****                   | 180 |
| Gh_D13G0089    | QIERELDMLARHHEKTTAKPASQKSVEIPDVPSEIKLQCVKTPDKGRGMVQFDIPQASL                             | 240 |
| Gh_D13G0089_N5 | QIERELDMLARHHEKTTAKPASQKSVEIPDVPSEIKLQCVKTPDKGRGMVQFDIPQASL<br>*****                    | 240 |
| Gh_D13G0089    | IHAEPYAVVILKHCRETHCHYCLNELPADTIPCSLPLYCSQHCQVQAGGPIHIPDT                                | 300 |
| Gh_D13G0089_N5 | IHAEPYAVVILKHCRETHCHYCLNELPADTIPCSLPLYCSQHCQVQAGGPIHIPDT<br>*****                       | 300 |
| Gh_D13G0089    | MVGSNFKPTLECIPEHKHECQGVHWPAILPSDVLVLAGRVVVKTMQKQGFQDVPNLSETL                            | 360 |
| Gh_D13G0089_N5 | MVGSNFKPTLECIPEHKHECQGVHWPAILPSDVLVLAGRVVVKTMQKQGFQDVPNLSETL<br>*****                   | 360 |
| Gh_D13G0089    | GLCESYSKMPESKLELHIYSIVLLFCLHHSFSSELSINGDSASQIVILLSQIRVNSIAV                             | 420 |
| Gh_D13G0089_N5 | GLCESYSKMPESKLELHIYSIVLLFCLHHSFSSELSINGDSASQIVILLSQIRVNSIAV<br>*****                    | 420 |
| Gh_D13G0089    | VRMRSNTNDSYDQDWFQNFQSFGEAEAASSVEQVRVQALYKAASLFNHSCLPNIHAYFM                             | 480 |
| Gh_D13G0089_N5 | VRMRSNTNDSYDQDWFQNFQSFGEAEAASSVEQVRVQALYKAASLFNHSCLPNIHAYFM<br>*****                    | 480 |
| Gh_D13G0089    | SRTLLLRTEFVSGGCALELSYGPQVQWQDCKDRLRFLEEEYFFRCWCCGCSEVNESDLV                             | 540 |
| Gh_D13G0089_N5 | SRTLLLRTEFVSGGCALELSYGPQVQWQDCKDRLRFLEEEYFFRCWCCGCSEVNESDLV<br>*****                    | 540 |
| Gh_D13G0089    | ISGFCCVNPNC SGVVL DNLVANCEKQKPNVPETISNKSHLQVHELKIDIDIKKVAQISLDQ                         | 600 |
| Gh_D13G0089_N5 | ISGFCCVNPNC SGVVL DNLVANCEKQKPNVPETISNKSHLQVHELKIDIDIKKVAQISLDQ<br>*****                | 600 |
| Gh_D13G0089    | TQSSFHVDSGYCLKCGSYCNFASRSKEVKKAWTDFRRLQDSIASKDTC <b>G</b> TNL <b>T</b> DALRSLG          | 660 |
| Gh_D13G0089_N5 | TQSSFHVDSGYCLKCGSYCNFASRSKEVKKAWTDFRRLQDSIASKDTC <b>S</b> TNL <b>P</b> DALRSLG<br>***** | 660 |
| Gh_D13G0089    | LLRSILHAYNKGIAEAEDILAKAFCFIGDFEPARDHCKASIEILEKLYGPNHIAIGYELA                            | 720 |
| Gh_D13G0089_N5 | LLRSILHAYNKGIAEAEDILAKAFCFIGDFEPARDHCKASIEILEKLYGPNHIAIGYELA<br>*****                   | 720 |
| Gh_D13G0089    | KLASIQLALGDCTAVYKINRLSAIFSTYYGPHAGIIFPYLLVLERERSRIIQ                                    | 772 |
| Gh_D13G0089_N5 | KLASIQLALGDCTAVYKINRLSAIFSTYYGPHAGIIFPYLLVLERERSRIIQ<br>*****                           | 772 |

(B)

|                |                                                                      |     |
|----------------|----------------------------------------------------------------------|-----|
| Gh_D13G0090    | MAEFMELEAQDGVMTWNVVPGTKEEAGNCVVPVSAIYTPIKPFPNMLVL <b>T</b> YAPLRCRNC | 60  |
| Gh_D13G0090_N5 | MAEFMELEAQDGVMTWNVVPGTKEEAGNCVVPVSAIYTPIKPFPNMLVL <b>P</b> YAPLRCRNC | 60  |
|                | *****                                                                |     |
| Gh_D13G0090    | SSVLNPFVMDFAAKIWIWPCFCHRSHPAHYASVSEENLPAELFPQYTTIEYKSPREAA           | 120 |
| Gh_D13G0090_N5 | SSVLNPFVMDFAAKIWIWPCFCHRSHPAHYASVSEENLPAELFPQYTTIEYKSPREAA           | 120 |
|                | *****                                                                |     |
| Gh_D13G0090    | CLQSVFMFVIDTSIIEEEMAFKLSALSQVIGLFPDNLVGLITFGTLVHLHEIGFSTAPK          | 180 |
| Gh_D13G0090_N5 | CLQSVFMFVIDTSIIEEEMAFKLSALSQVIGLFPDNLVGLITFGTLVHLHEIGFSTAPK          | 180 |
|                | *****                                                                |     |
| Gh_D13G0090    | TYVFKGSKDVSQKQLEQMGCFLNKPKPLTGVRDGLSSES IARFLLPASECEFAINSVLE         | 240 |
| Gh_D13G0090_N5 | TYVFKGSKDVSQKQLEQMGCFLNKPKPLTGVRDGLSSES IARFLLPASECEFAINSVLE         | 240 |
|                | *****                                                                |     |
| Gh_D13G0090    | ELQKDPWPIPADQRASRSTGTALSVAASLLGACFPGSGARIMAFLLGGPSTEGPGAIVSKN        | 300 |
| Gh_D13G0090_N5 | ELQKDPWPIPADQRASRSTGTALSVAASLLGACFPGSGARIMAFLLGGPSTEGPGAIVSKN        | 300 |
|                | *****                                                                |     |
| Gh_D13G0090    | LSEPIRSHKDLDKDSAPHYHKAIKFYETLAKQLVHGQHVLDLFAVAVDQVGAELKVVVE          | 360 |
| Gh_D13G0090_N5 | LSEPIRSHKDLDKDSAPHYHKAIKFYETLAKQLVHGQHVLDLFAVAVDQVGAELKVVVE          | 360 |
|                | *****                                                                |     |
| Gh_D13G0090    | RTGGFVVLAESEFGHSVFKDTRLRRVFSQSGDKGLGLSSNGIFEVNCSDLKVKQVGLGPCASL      | 420 |
| Gh_D13G0090_N5 | RTGGFVVLAESEFGHSVFKDTRLRRVFSQSGDKGLGLSSNGIFEVNCSDLKVKQVGLGPCASL      | 420 |
|                | *****                                                                |     |
| Gh_D13G0090    | EKRSPKCSDTIIGQGNTSAWKMCGLDQATSLCLVFDIVRKDIPDATVQSSSSQFYFQFLT         | 480 |
| Gh_D13G0090_N5 | EKRSPKCSDTIIGQGNTSAWKMCGLDQATSLCLVFDIVRKDIPDATVQSSSSQFYFQFLT         | 480 |
|                | *****                                                                |     |
| Gh_D13G0090    | FYQHSSGEMRLRVTTLSRRWVAGPGSIQDLISGFDQAAAAAMARLVSFKMEIEAEFDPI          | 540 |
| Gh_D13G0090_N5 | FYQHSSGEMRLRVTTLSRRWVAGPGSIQDLISGFDQAAAAAMARLVSFKMEIEAEFDPI          | 540 |
|                | *****                                                                |     |
| Gh_D13G0090    | RWLDKALIHICSRFGDYQKDTSSFSLSPRFSIFPQFMFHLRRSQFVQVFNNSPDETAYF          | 600 |
| Gh_D13G0090_N5 | RWLDKALIHICSRFGDYQKDTSSFSLSPRFSIFPQFMFHLRRSQFVQVFNNSPDETAYF          | 600 |
|                | *****                                                                |     |
| Gh_D13G0090    | RMILNRENVANSVVMIQPSLVSYSFQSVPEPALLDVTAIAADRILLDSYFTVVI FHGST         | 660 |
| Gh_D13G0090_N5 | RMILNRENVANSVVMIQPSLVSYSFQSVPEPALLDVTAIAADRILLDSYFTVVI FHGST         | 660 |
|                | *****                                                                |     |
| Gh_D13G0090    | IAQWRKAGYHDLPEHQAFQALLQAPRDDADAI INERFPVPRLVICDQHGSQARFLLAKLN        | 720 |
| Gh_D13G0090_N5 | IAQWRKAGYHDLPEHQAFQALLQAPRDDADAI INERFPVPRLVICDQHGSQARFLLAKLN        | 720 |
|                | *****                                                                |     |
| Gh_D13G0090    | PSASCNSDGHRRPGDII FTDDVSFEVFLDHLQRLAVQ 757                           |     |
| Gh_D13G0090_N5 | PSASCNSDGHRRPGDII FTDDVSFEVFLDHLQRLAVQ 757                           |     |
|                | *****                                                                |     |

**Figure S7.** Alignment of protein sequences of (A) Gh\_D13G0089 and (B) Gh\_D13G0090 that have amino acid change(s) (highlighted in red) in the N5 mutant.
