# Supplementary material
Source: publisher figshare collection journal article supplement (https://gsajournals.figshare.com/articles/dataset/_/13345268)
Supplement: Supplementary file 7 [file 1]

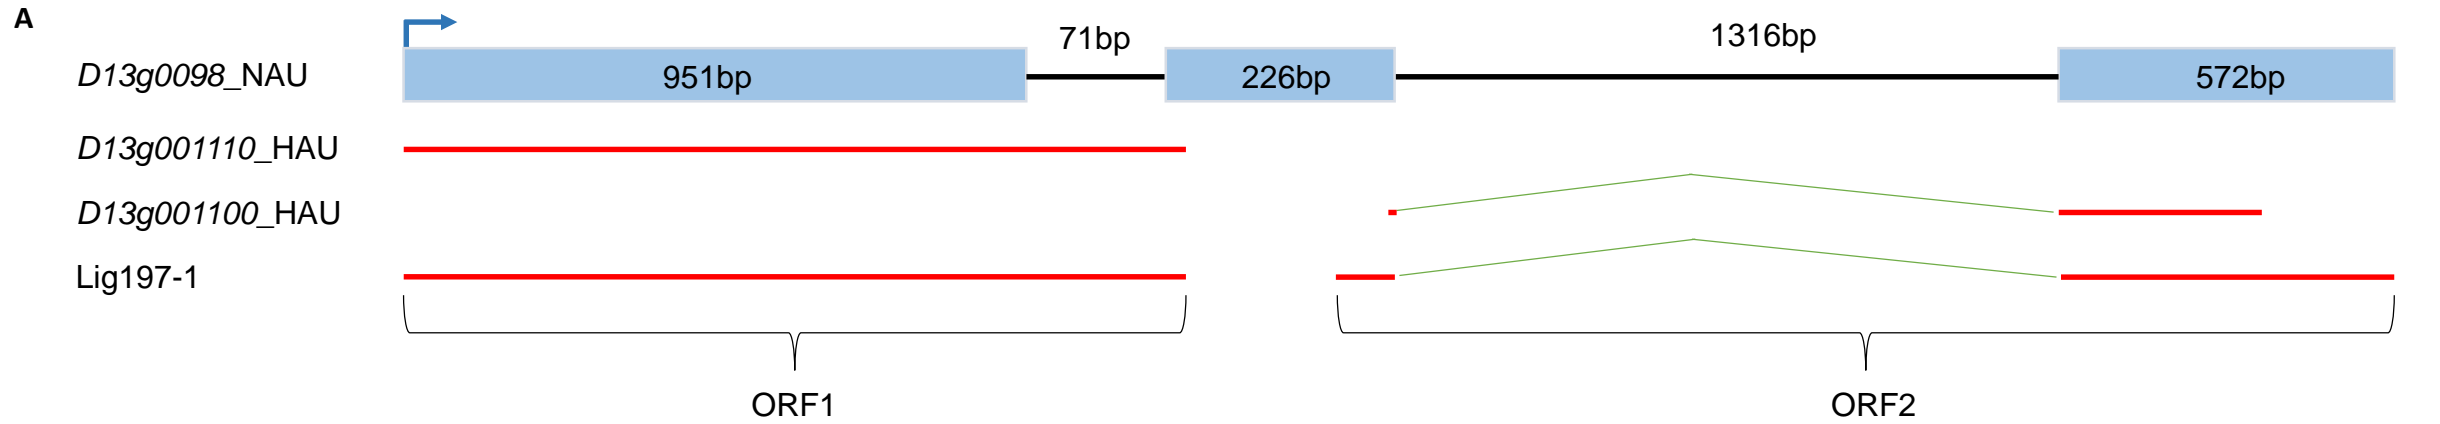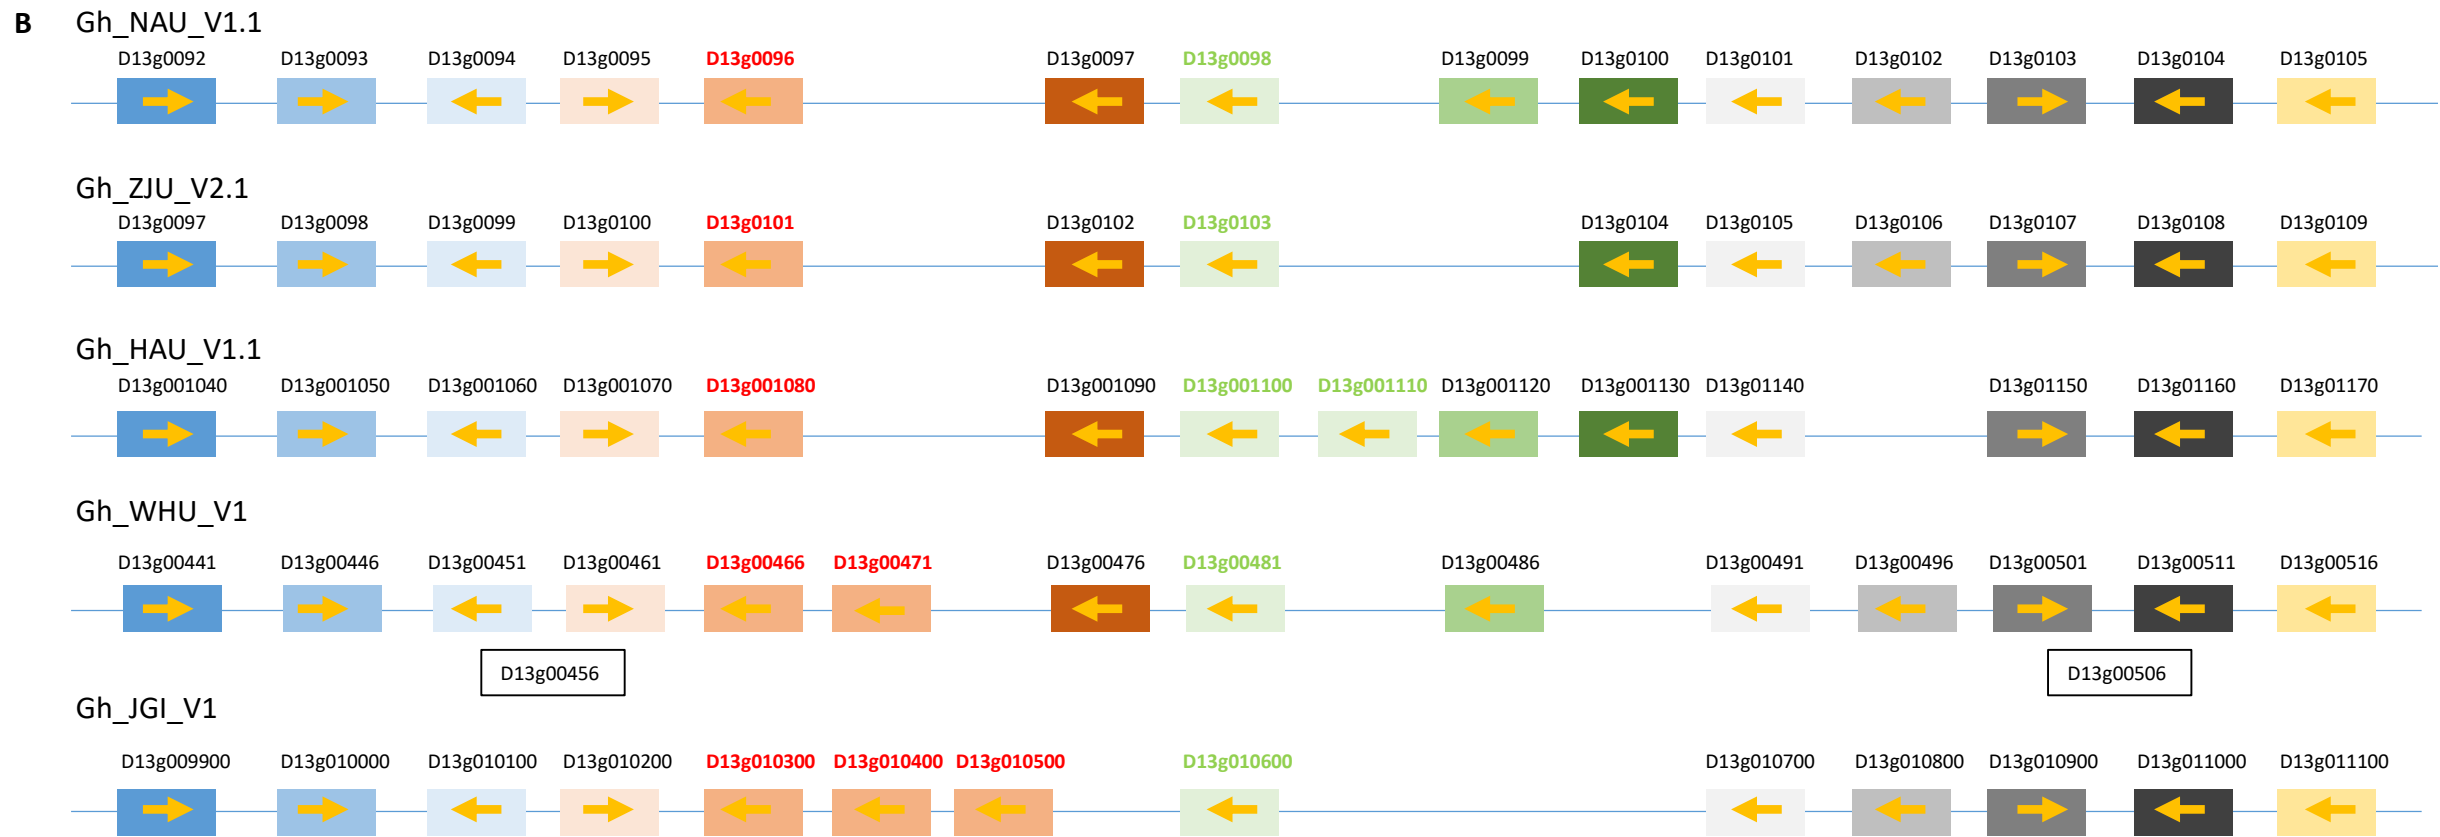

**Figure S6** (A) Variable annotation of *D13G0098*, red and green line representing coding and non-coding sequence, respectively, Lig197-1 is a representative cDNA; and (B) comparison of *D13G0096* and *D13G0098* with their counterparts annotated in other published *G. hirsutum* genomes
